# Supplementary material for: The highly selective oxidation of cyclohexane to cyclohexanone and cyclohexanol over VAlPO4 berlinite by oxygen under atmospheric pressure
Source: PubMed Central journal article supplement (PMC5884748; doi:10.1186/s13065-018-0405-6), 2018-04-04
Supplement: 13065_2018_405_MOESM1_ESM.pdf [file 13065_2018_405_MOESM1_ESM.pdf]

谱库检索报告

数据路径 : D:\msdchem\1\data\徐雄发\方岩雄-肖业鹏\  
数据文件 : 8.D  
采集 : 29 Apr 2014 16:46  
操作者 :  
样品 : 8  
其他 :  
ALS 样品瓶: 8 样品乘积因子: 1

检索库: D:\DATABASE\DEMO.L 最小匹配度: 0  
C:\DATABASE\NIST11.L 最小匹配度: 0

未知谱图: 顶点  
积分事件: 化学工作站积分器 - events.e

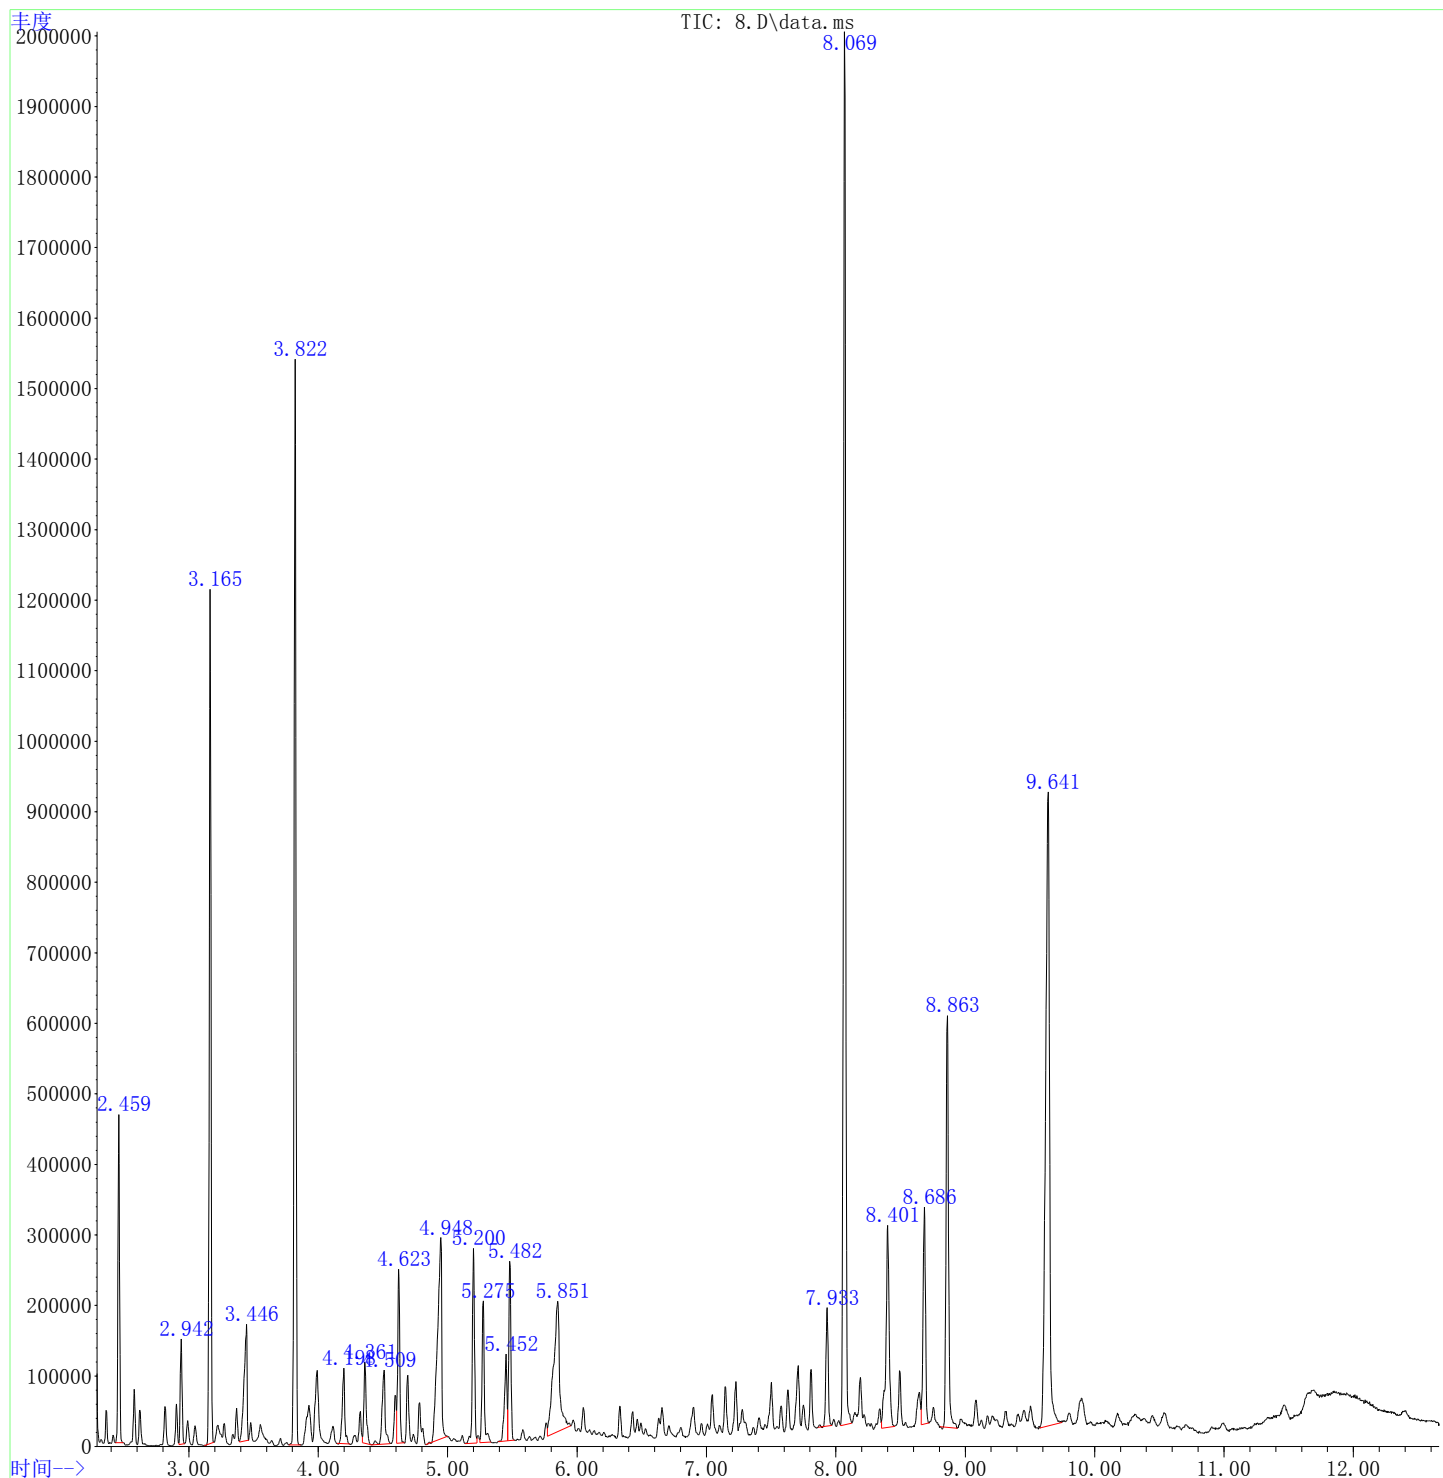

未知谱图基于顶点

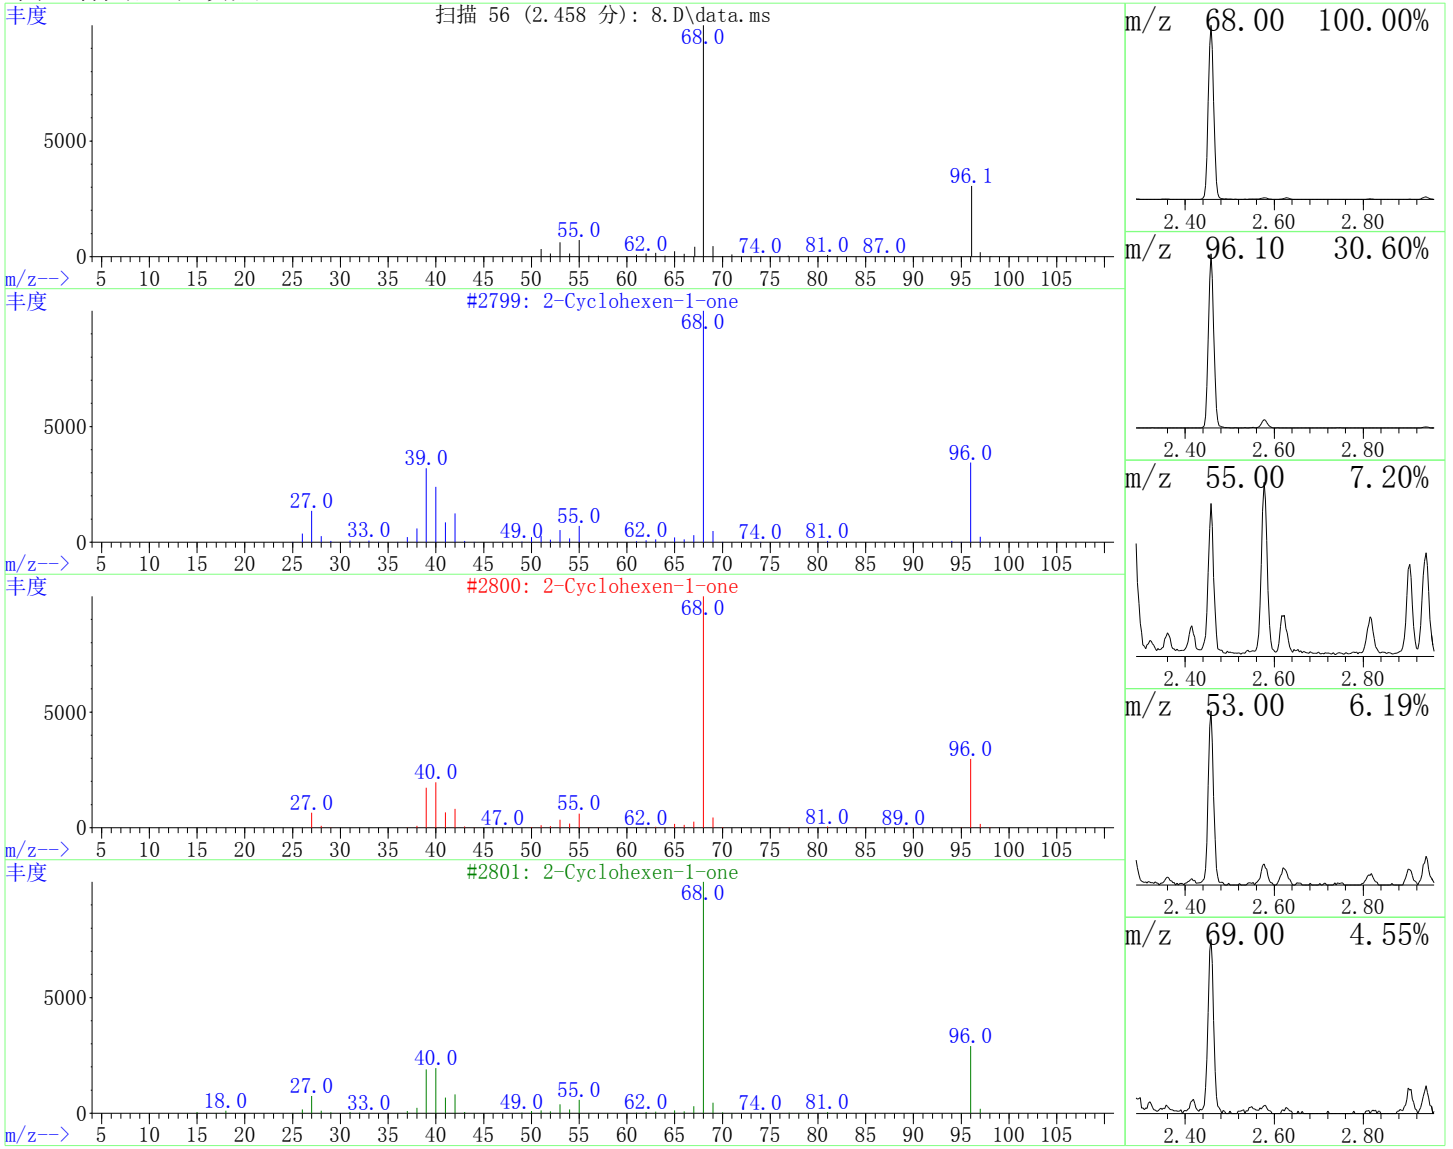

Data File: D:\msdchem\1\data\徐雄发\方岩雄-肖业鹏\8.D  
 样品: 8

峰编号: 1                      2.458 分钟处    面积: 3973205    面积 % 3.14

每个谱库中 3 个最匹配的记录。

Ref\#      CAS\#      匹配度

D:\DATABASE\DEMO.L      未检索到匹配。

C:\DATABASE\NIST11.L

|   |                    |      |             |    |
|---|--------------------|------|-------------|----|
| 1 | 2-Cyclohexen-1-one | 2799 | 000930-68-7 | 90 |
| 2 | 2-Cyclohexen-1-one | 2800 | 000930-68-7 | 90 |
| 3 | 2-Cyclohexen-1-one | 2801 | 000930-68-7 | 90 |



未知谱图基于顶点

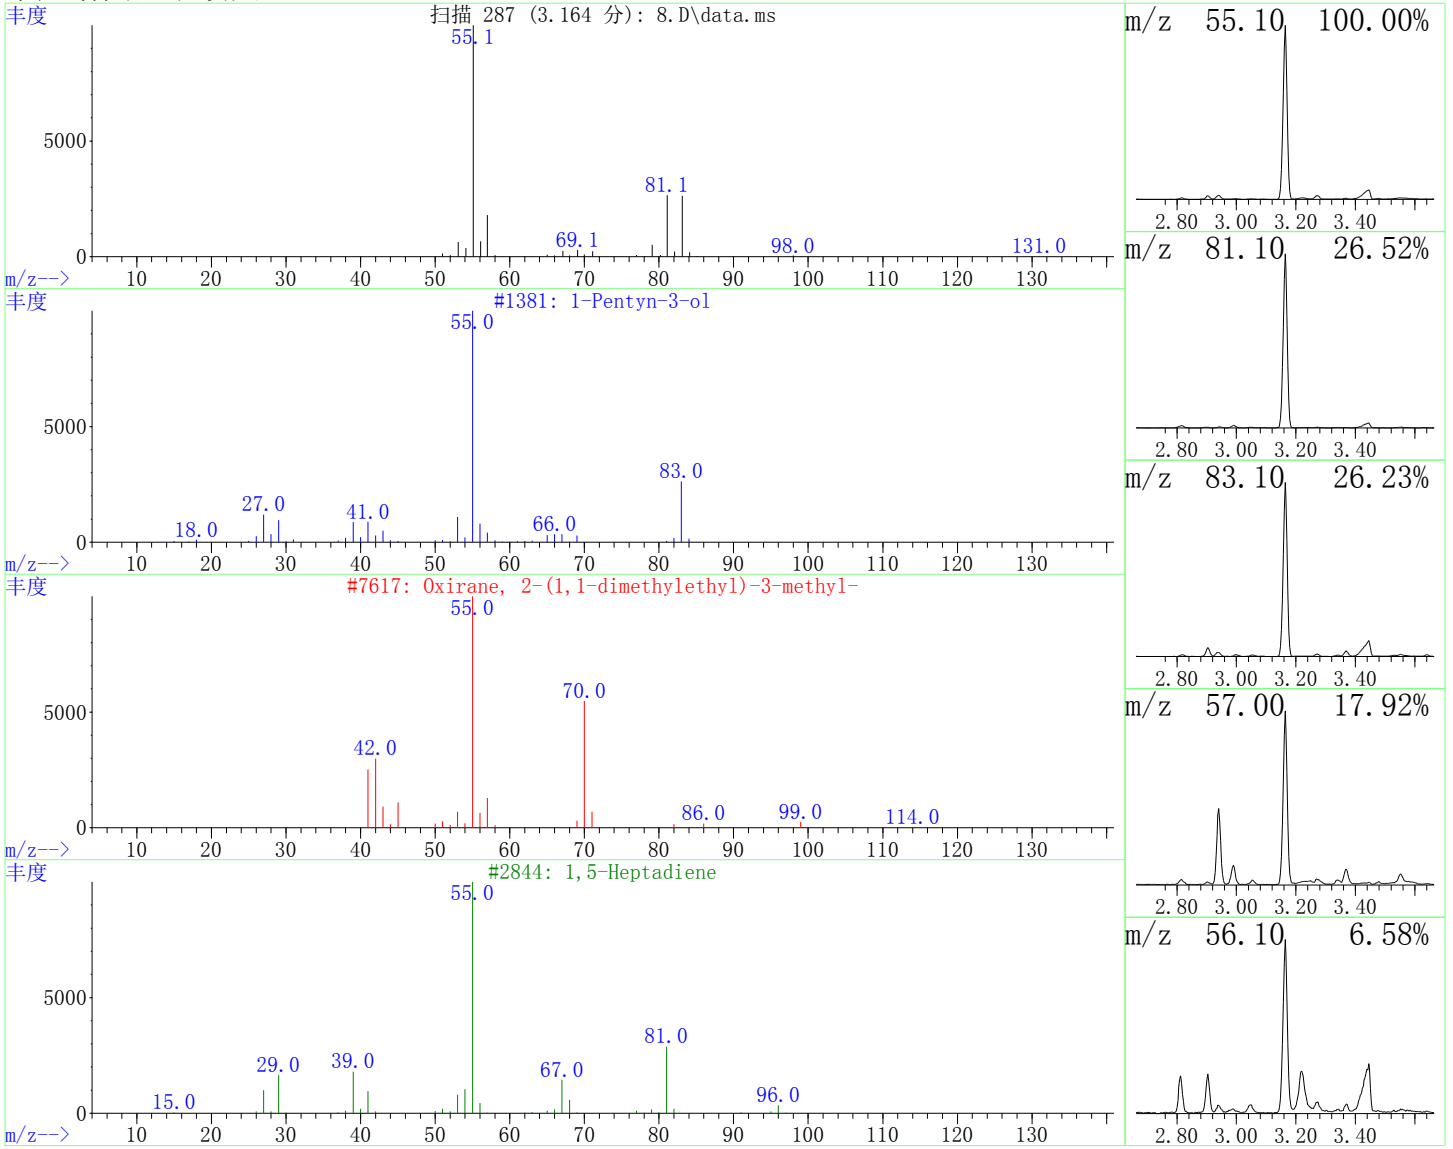

Data File: D:\msdchem\1\data\徐雄发\方岩雄-肖业鹏\8.D  
 样品: 8

峰编号: 3                      3.164 分钟处    面积: 11489845    面积 % 9.07

每个谱库中 3 个最匹配的记录。

Ref\#      CAS\#      匹配度

D:\DATABASE\DEMO.L      未检索到匹配。

C:\DATABASE\NIST11.L

|   |                                     |      |             |    |
|---|-------------------------------------|------|-------------|----|
| 1 | 1-Pentyn-3-ol                       | 1381 | 004187-86-4 | 33 |
| 2 | Oxirane, 2-(1,1-dimethylethyl)-3... | 7617 | 053897-30-6 | 23 |
| 3 | 1,5-Heptadiene                      | 2844 | 001541-23-7 | 17 |

未知谱图基于顶点

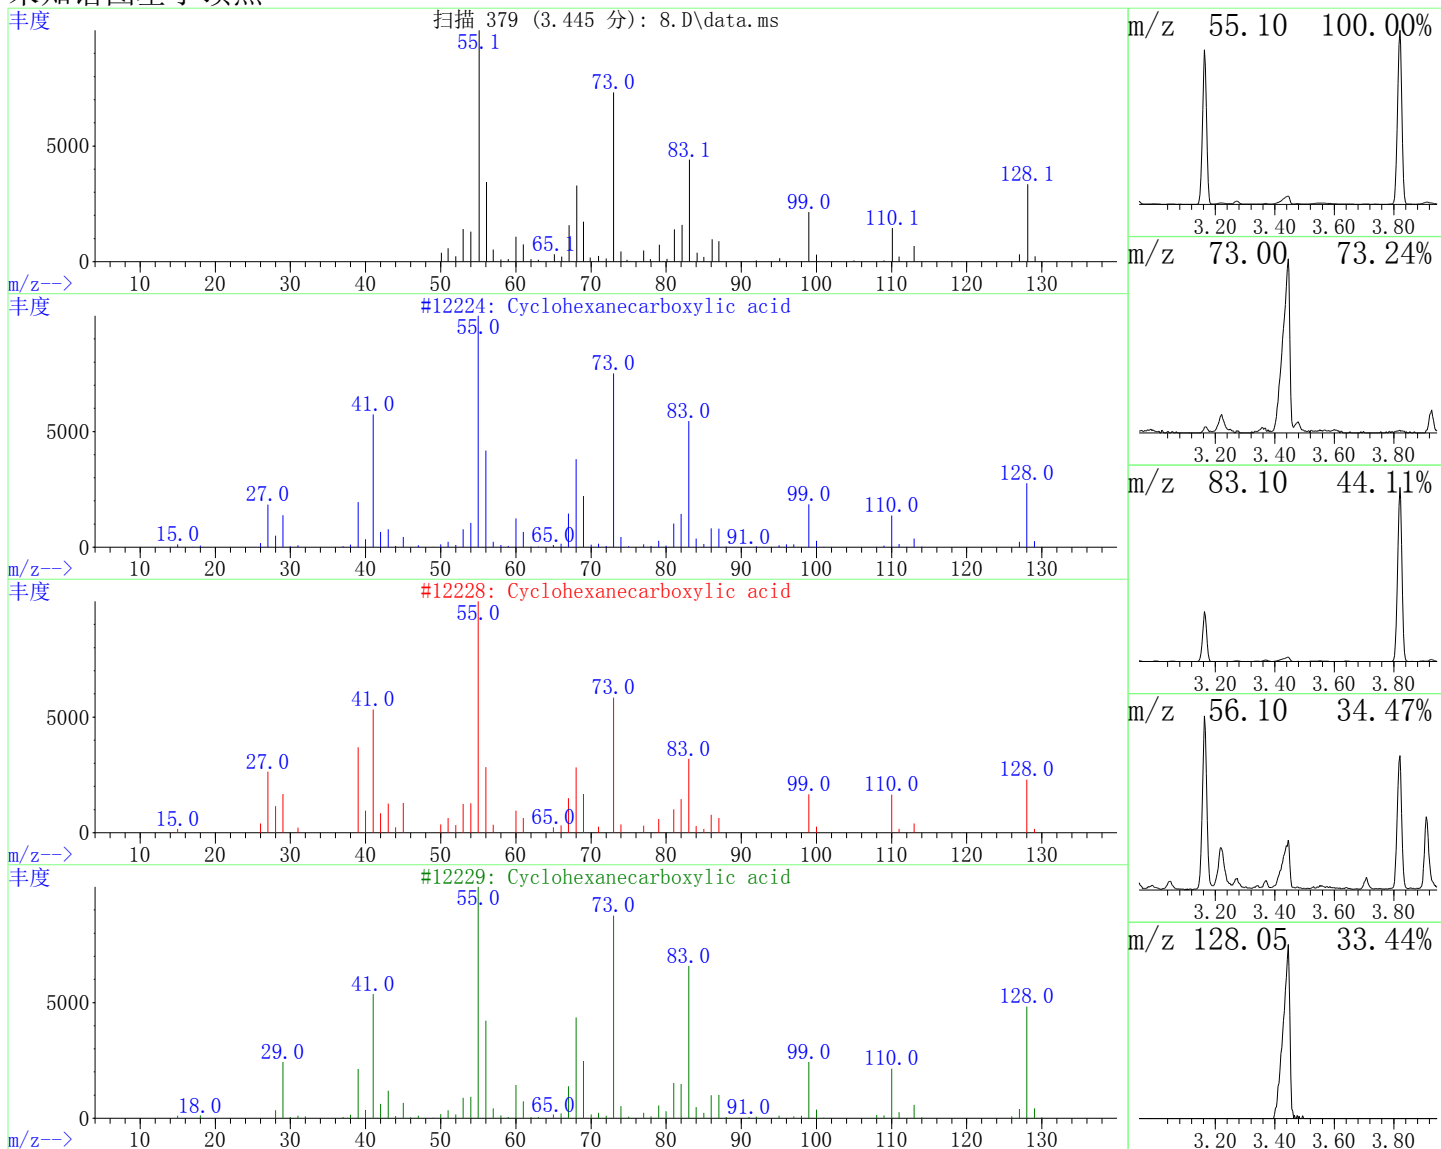

Data File: D:\msdchem\1\data\徐雄发\方岩雄-肖业鹏\8.D  
 样品: 8

峰编号: 4                      3.445 分钟处    面积: 2700186    面积 % 2.13

每个谱库中 3 个最匹配的记录。

Ref\#      CAS\#      匹配度

D:\DATABASE\DEMO.L      未检索到匹配。

C:\DATABASE\NIST11.L

|   |                            |       |             |    |
|---|----------------------------|-------|-------------|----|
| 1 | Cyclohexanecarboxylic acid | 12224 | 000098-89-5 | 97 |
| 2 | Cyclohexanecarboxylic acid | 12228 | 000098-89-5 | 91 |
| 3 | Cyclohexanecarboxylic acid | 12229 | 000098-89-5 | 87 |

未知谱图基于顶点

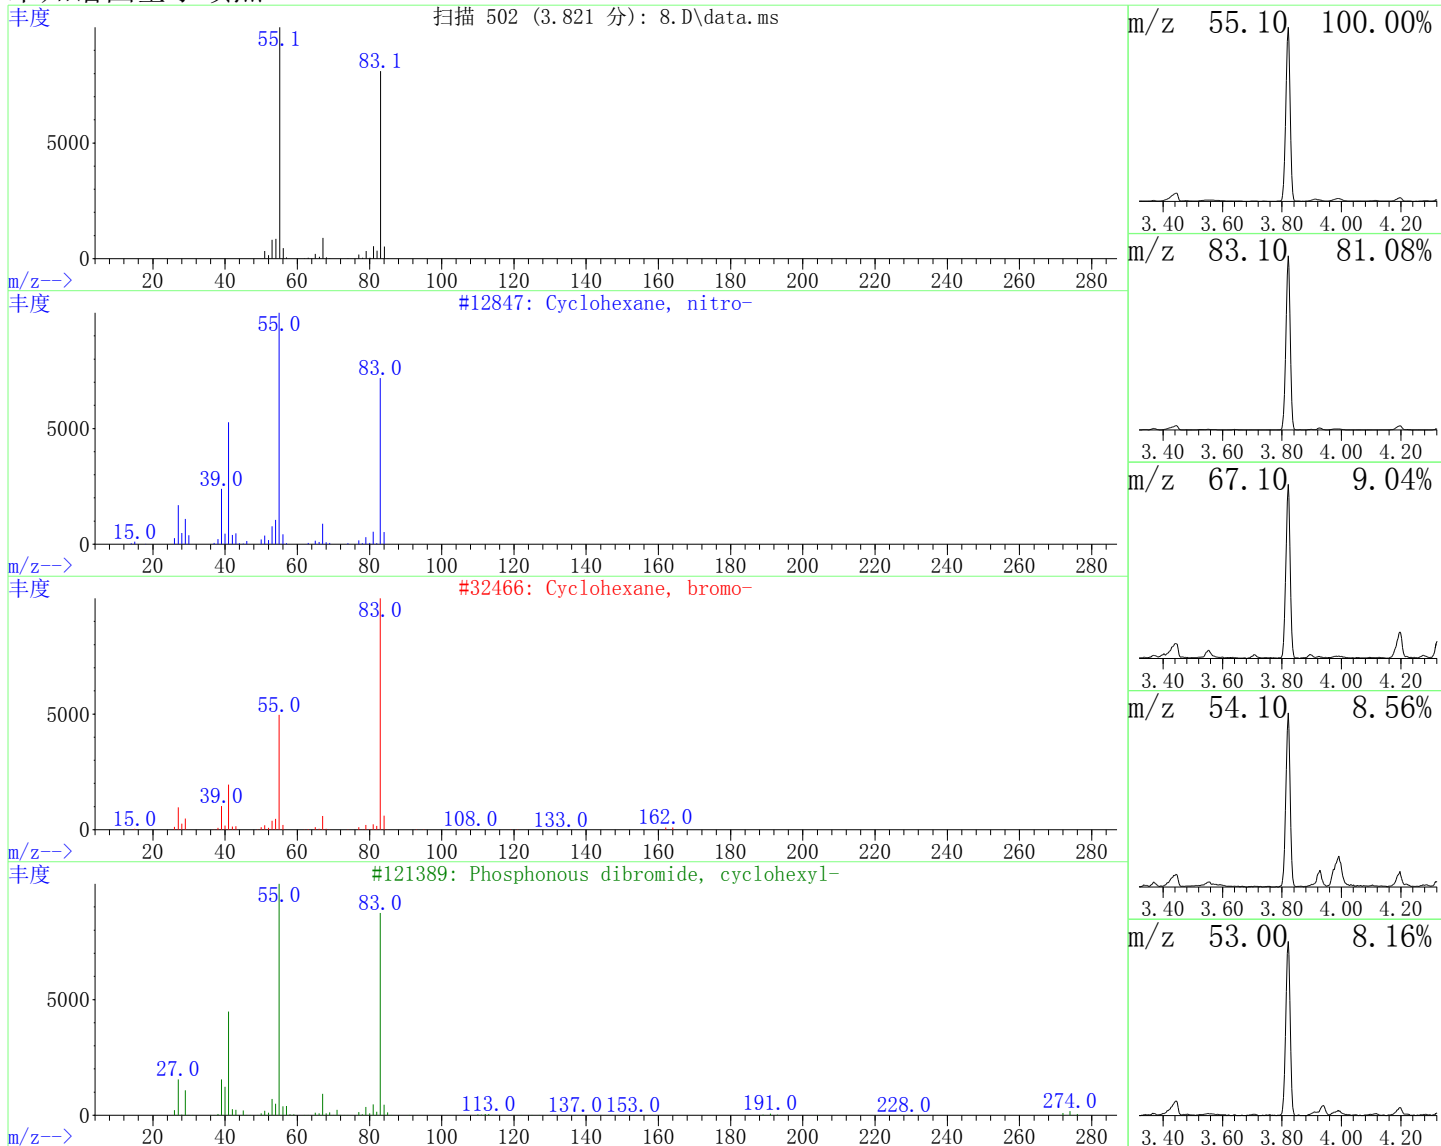

Data File: D:\msdchem\1\data\徐雄发\方岩雄-肖业鹏\8.D  
 样品: 8

峰编号: 5                      3.821 分钟处    面积: 15650168    面积 % 12.36

每个谱库中 3 个最匹配的记录。

Ref\#      CAS\#      匹配度

D:\DATABASE\DEMO.L      未检索到匹配。

C:\DATABASE\NIST11.L

- |                                      |        |             |    |
|--------------------------------------|--------|-------------|----|
| 1 Cyclohexane, nitro-                | 12847  | 001122-60-7 | 83 |
| 2 Cyclohexane, bromo-                | 32466  | 000108-85-0 | 83 |
| 3 Phosphonous dibromide, cyclohexyl- | 121389 | 086012-32-0 | 74 |

未知谱图基于顶点

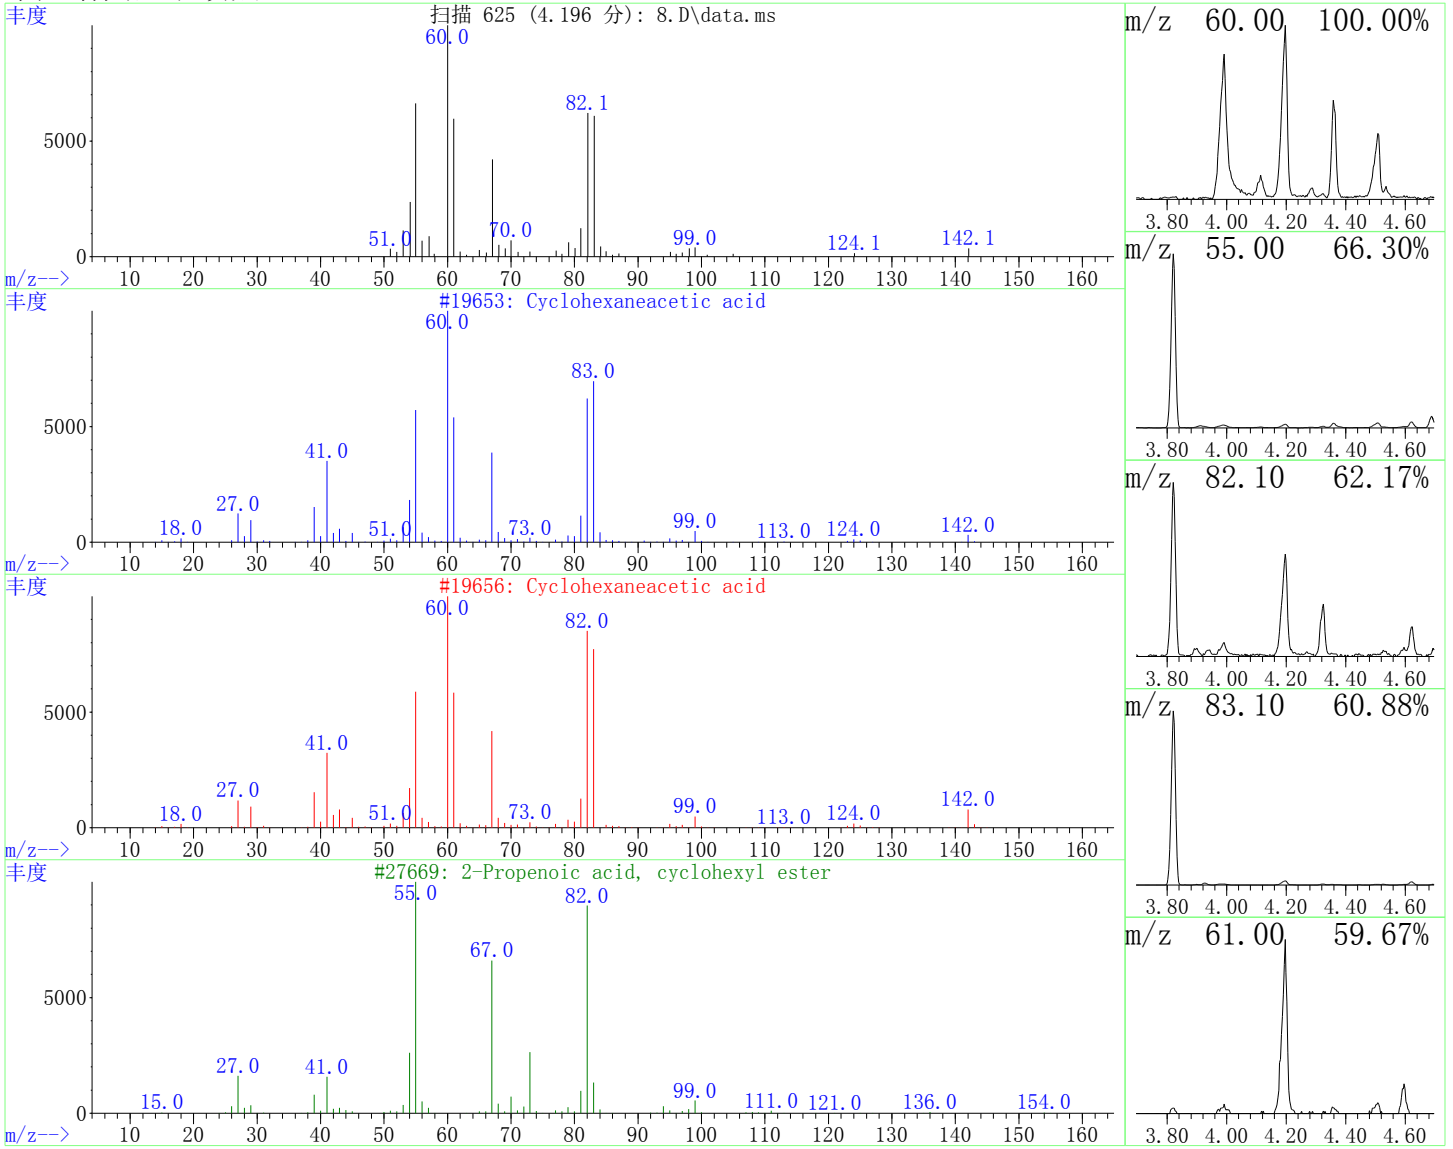

Data File: D:\msdchem\1\data\徐雄发\方岩雄-肖业鹏\8.D  
 样品: 8

峰编号: 6                      4.196 分钟处    面积: 1457115    面积 % 1.15

每个谱库中 3 个最匹配的记录。

Ref\#      CAS\#      匹配度

D:\DATABASE\DEMO.L      未检索到匹配。

C:\DATABASE\NIST11.L

- |                                      |       |             |    |
|--------------------------------------|-------|-------------|----|
| 1 Cyclohexaneacetic acid             | 19653 | 005292-21-7 | 97 |
| 2 Cyclohexaneacetic acid             | 19656 | 005292-21-7 | 78 |
| 3 2-Propenoic acid, cyclohexyl ester | 27669 | 003066-71-5 | 27 |

未知谱图基于顶点

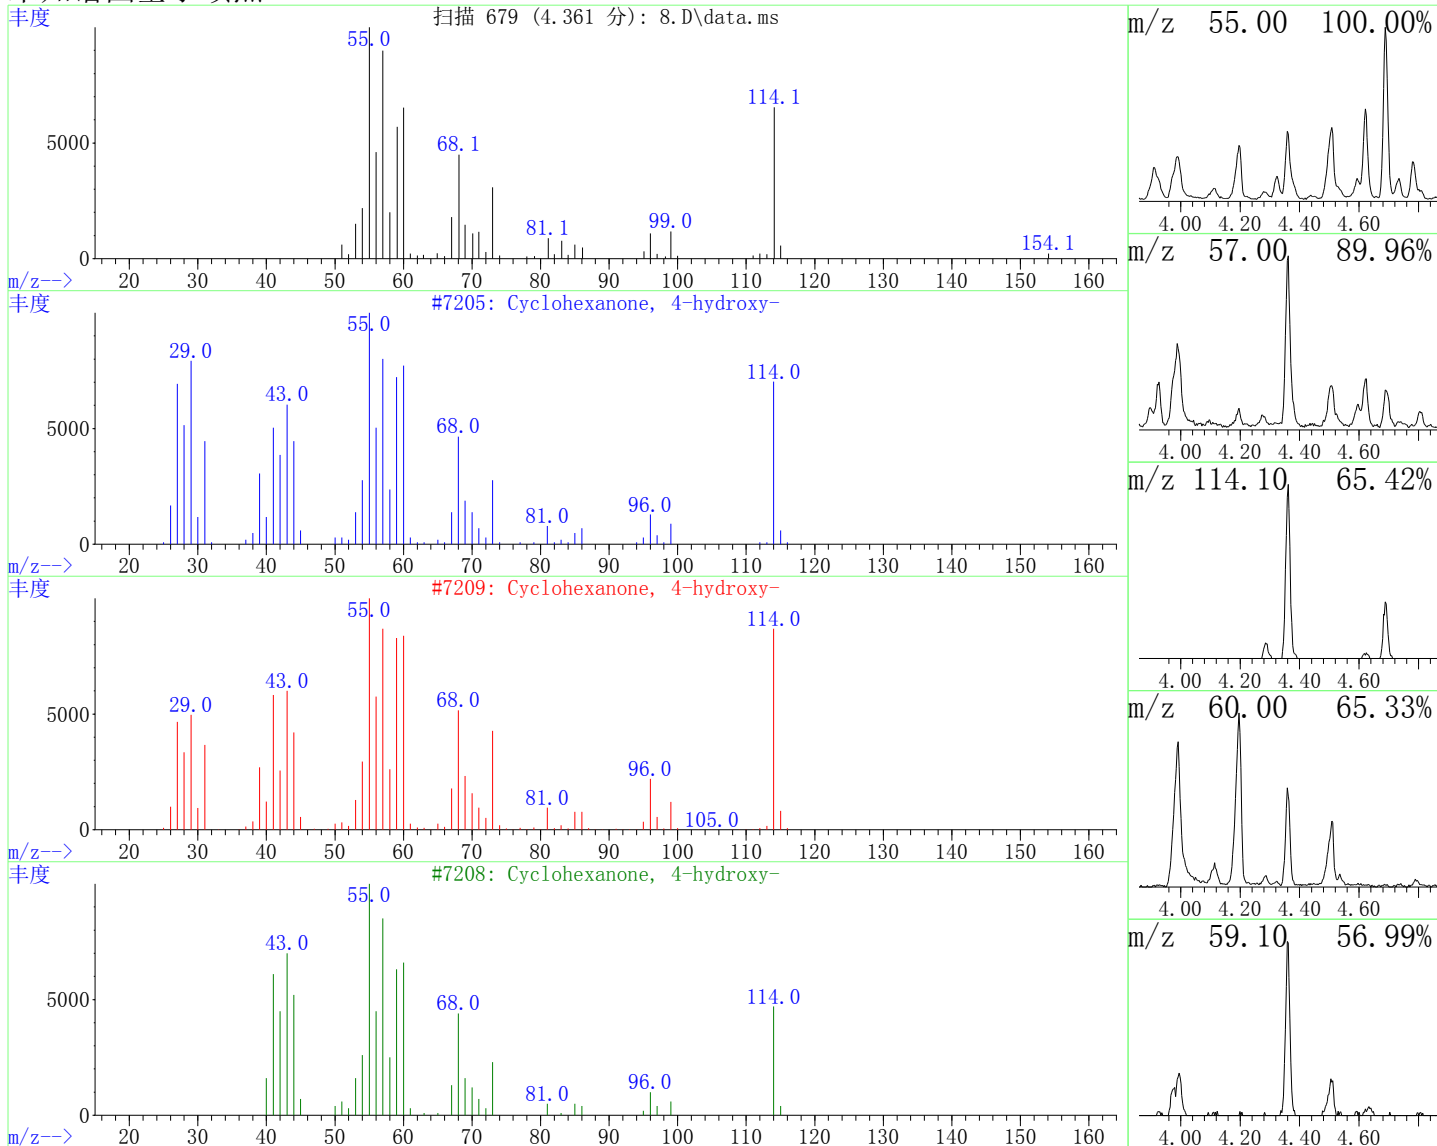

Data File: D:\msdchem\1\data\徐雄发\方岩雄-肖业鹏\8.D  
 样品: 8

峰编号: 7                      4.361 分钟处    面积: 1464243    面积 % 1.16

每个谱库中 3 个最匹配的记录。

Ref\#      CAS\#      匹配度

D:\DATABASE\DEMO.L      未检索到匹配。

C:\DATABASE\NIST11.L

- |                             |      |             |    |
|-----------------------------|------|-------------|----|
| 1 Cyclohexanone, 4-hydroxy- | 7205 | 013482-22-9 | 97 |
| 2 Cyclohexanone, 4-hydroxy- | 7209 | 013482-22-9 | 80 |
| 3 Cyclohexanone, 4-hydroxy- | 7208 | 013482-22-9 | 64 |



未知谱图基于顶点

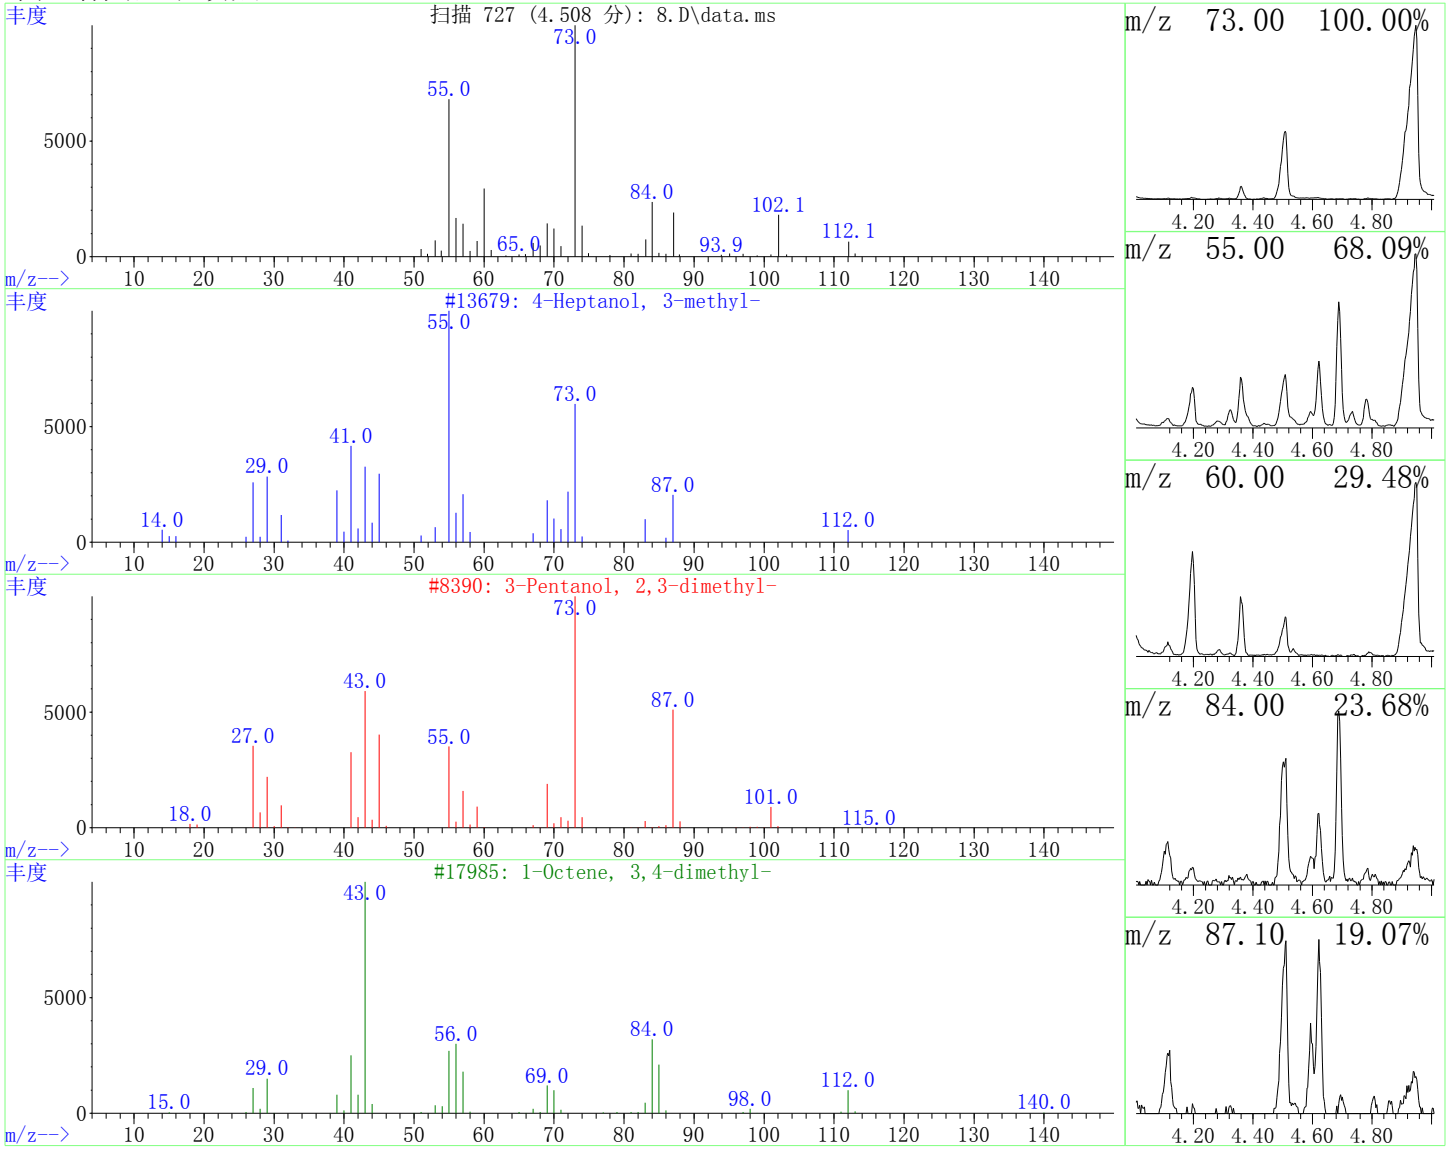

Data File: D:\msdchem\1\data\徐雄发\方岩雄-肖业鹏\8.D  
 样品: 8

峰编号: 8                      4.508 分钟处    面积: 1741486    面积 % 1.38

每个谱库中 3 个最匹配的记录。

Ref\#      CAS\#      匹配度

D:\DATABASE\DEMO.L      未检索到匹配。

C:\DATABASE\NIST11.L

|   |                           |       |             |    |
|---|---------------------------|-------|-------------|----|
| 1 | 4-Heptanol, 3-methyl-     | 13679 | 001838-73-9 | 38 |
| 2 | 3-Pentanol, 2,3-dimethyl- | 8390  | 000595-41-5 | 35 |
| 3 | 1-Octene, 3,4-dimethyl-   | 17985 | 056728-11-1 | 22 |

未知谱图基于顶点

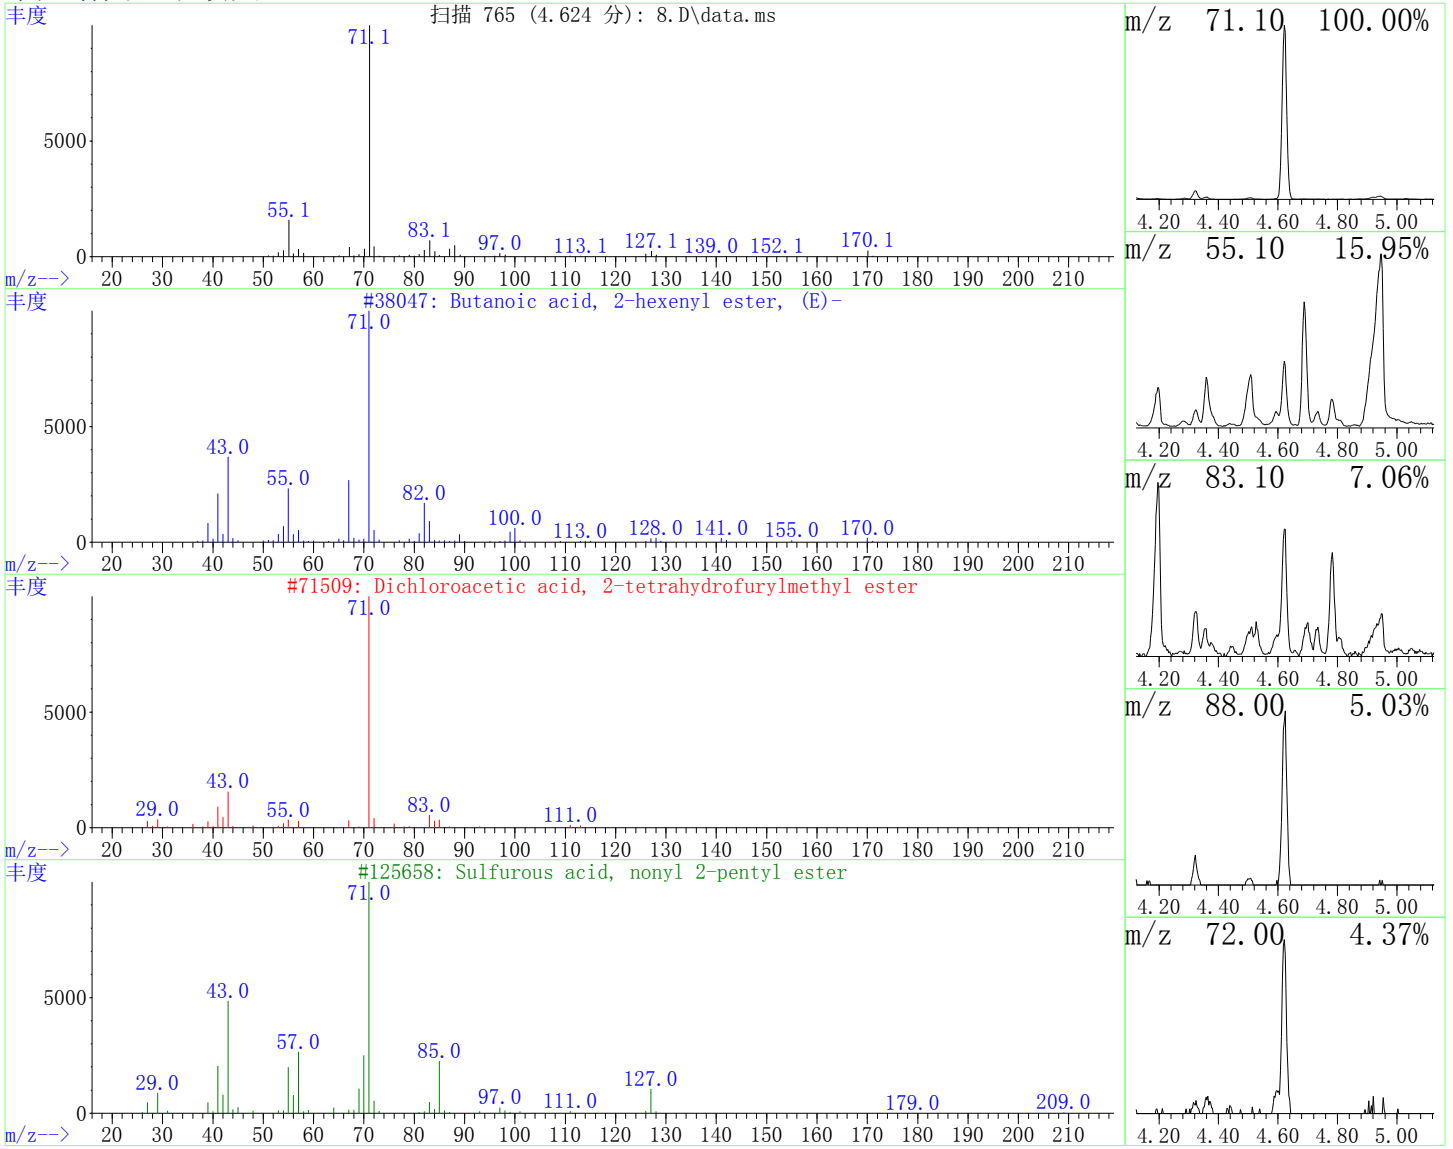

Data File: D:\msdchem\1\data\徐雄发\方岩雄-肖业鹏\8.D  
 样品: 8

峰编号: 9                      4.624 分钟处    面积: 2774519    面积 % 2.19

每个谱库中 3 个最匹配的记录。

Ref\#      CAS\#      匹配度

D:\DATABASE\DEMO.L      未检索到匹配。

C:\DATABASE\NIST11.L

- |                                       |                     |    |
|---------------------------------------|---------------------|----|
| 1 Butanoic acid, 2-hexenyl ester, ... | 38047 053398-83-7   | 39 |
| 2 Dichloroacetic acid, 2-tetrahydr... | 71509 004697-00-1   | 39 |
| 3 Sulfurous acid, nonyl 2-pentyl e... | 125658 1000309-15-8 | 39 |

未知谱图基于顶点

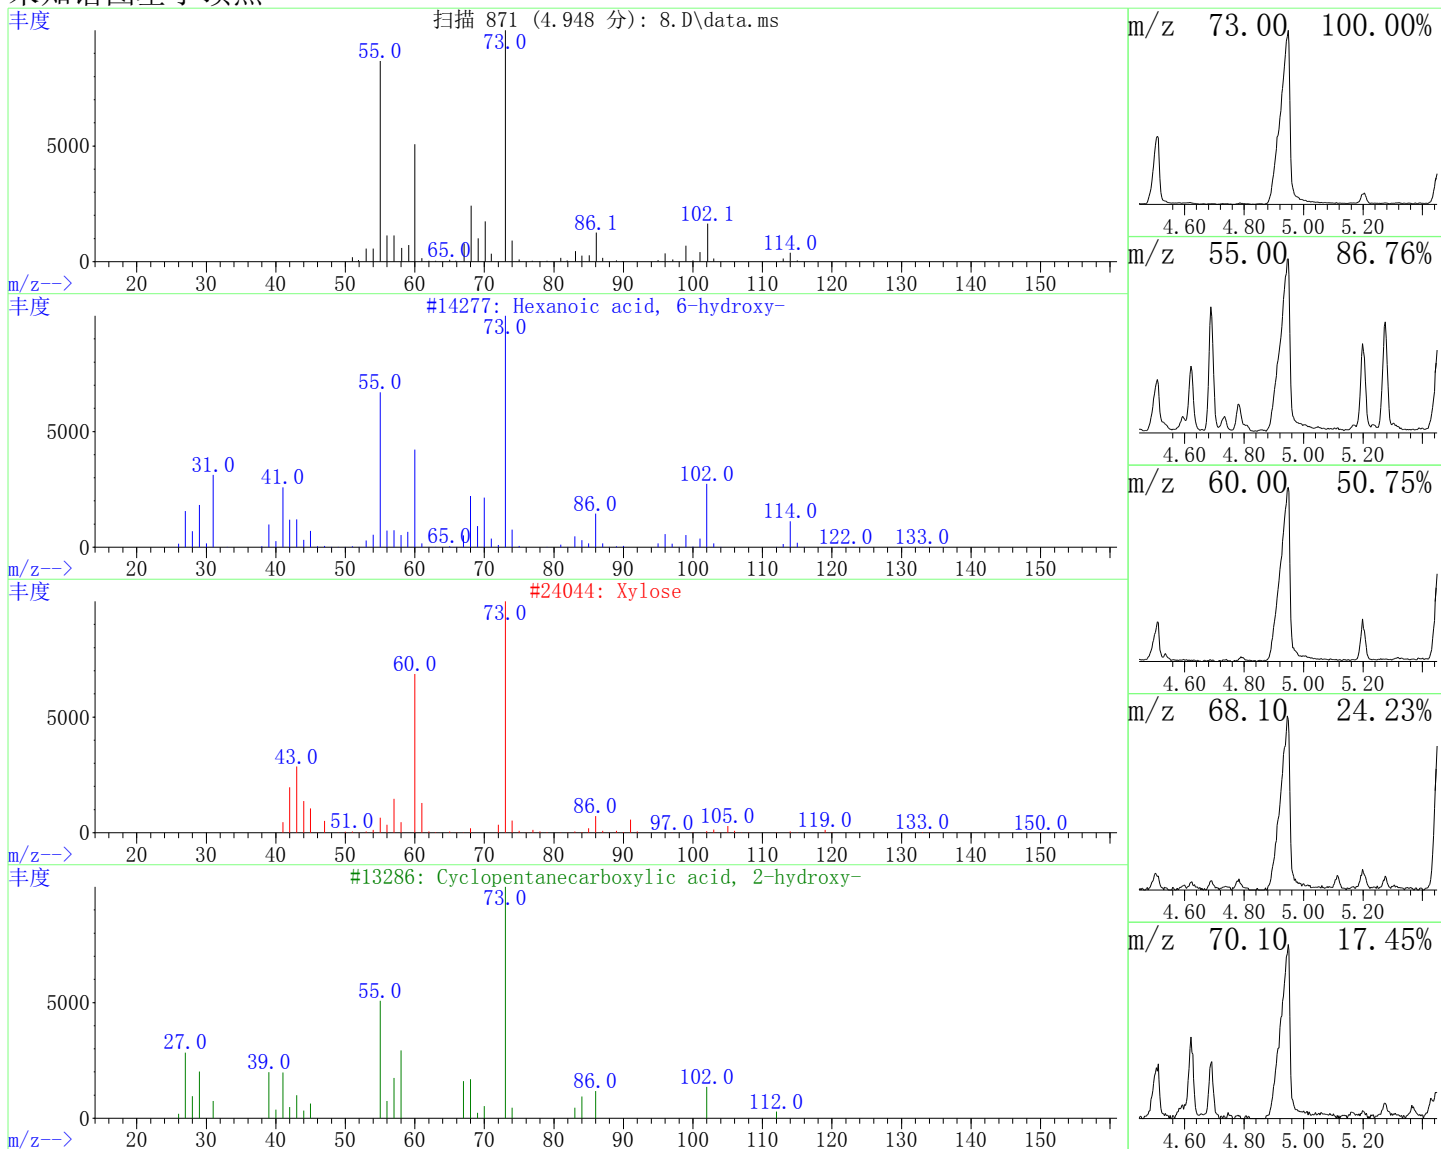

Data File: D:\msdchem\1\data\徐雄发\方岩雄-肖业鹏\8.D  
 样品: 8

峰编号: 10                      4.948 分钟处    面积: 6431080    面积 % 5.08

每个谱库中 3 个最匹配的记录。

Ref\#      CAS\#      匹配度

D:\DATABASE\DEMO.L      未检索到匹配。

C:\DATABASE\NIST11.L

- |                                       |       |             |    |
|---------------------------------------|-------|-------------|----|
| 1 Hexanoic acid, 6-hydroxy-           | 14277 | 001191-25-9 | 53 |
| 2 Xylose                              | 24044 | 000058-86-6 | 32 |
| 3 Cyclopentanecarboxylic acid, 2-h... | 13286 | 081887-89-0 | 32 |

未知谱图基于顶点

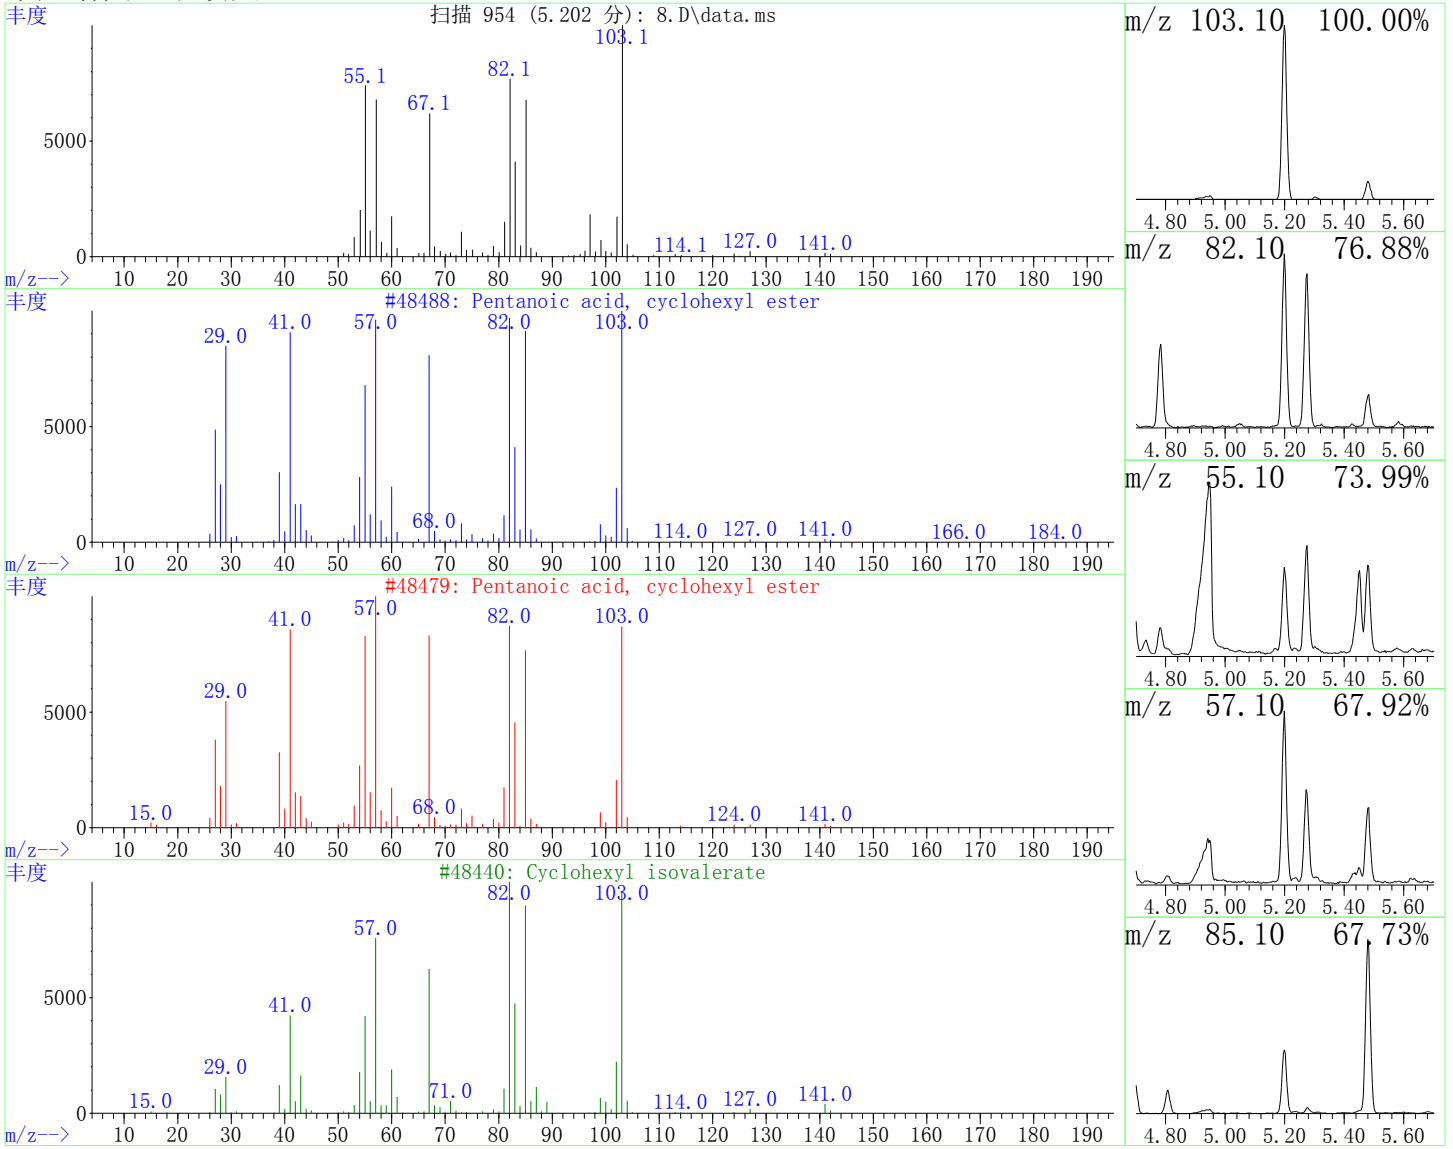

Data File: D:\msdchem\1\data\徐雄发\方岩雄-肖业鹏\8.D  
 样品: 8

峰编号: 11                      5.202 分钟处    面积: 3273767    面积 % 2.59

每个谱库中 3 个最匹配的记录。

Ref\#      CAS\#      匹配度

D:\DATABASE\DEMO.L      未检索到匹配。

C:\DATABASE\NIST11.L

- |   |                                  |       |             |    |
|---|----------------------------------|-------|-------------|----|
| 1 | Pentanoic acid, cyclohexyl ester | 48488 | 001551-43-5 | 87 |
| 2 | Pentanoic acid, cyclohexyl ester | 48479 | 001551-43-5 | 81 |
| 3 | Cyclohexyl isovalerate           | 48440 | 007774-44-9 | 80 |

未知谱图基于顶点

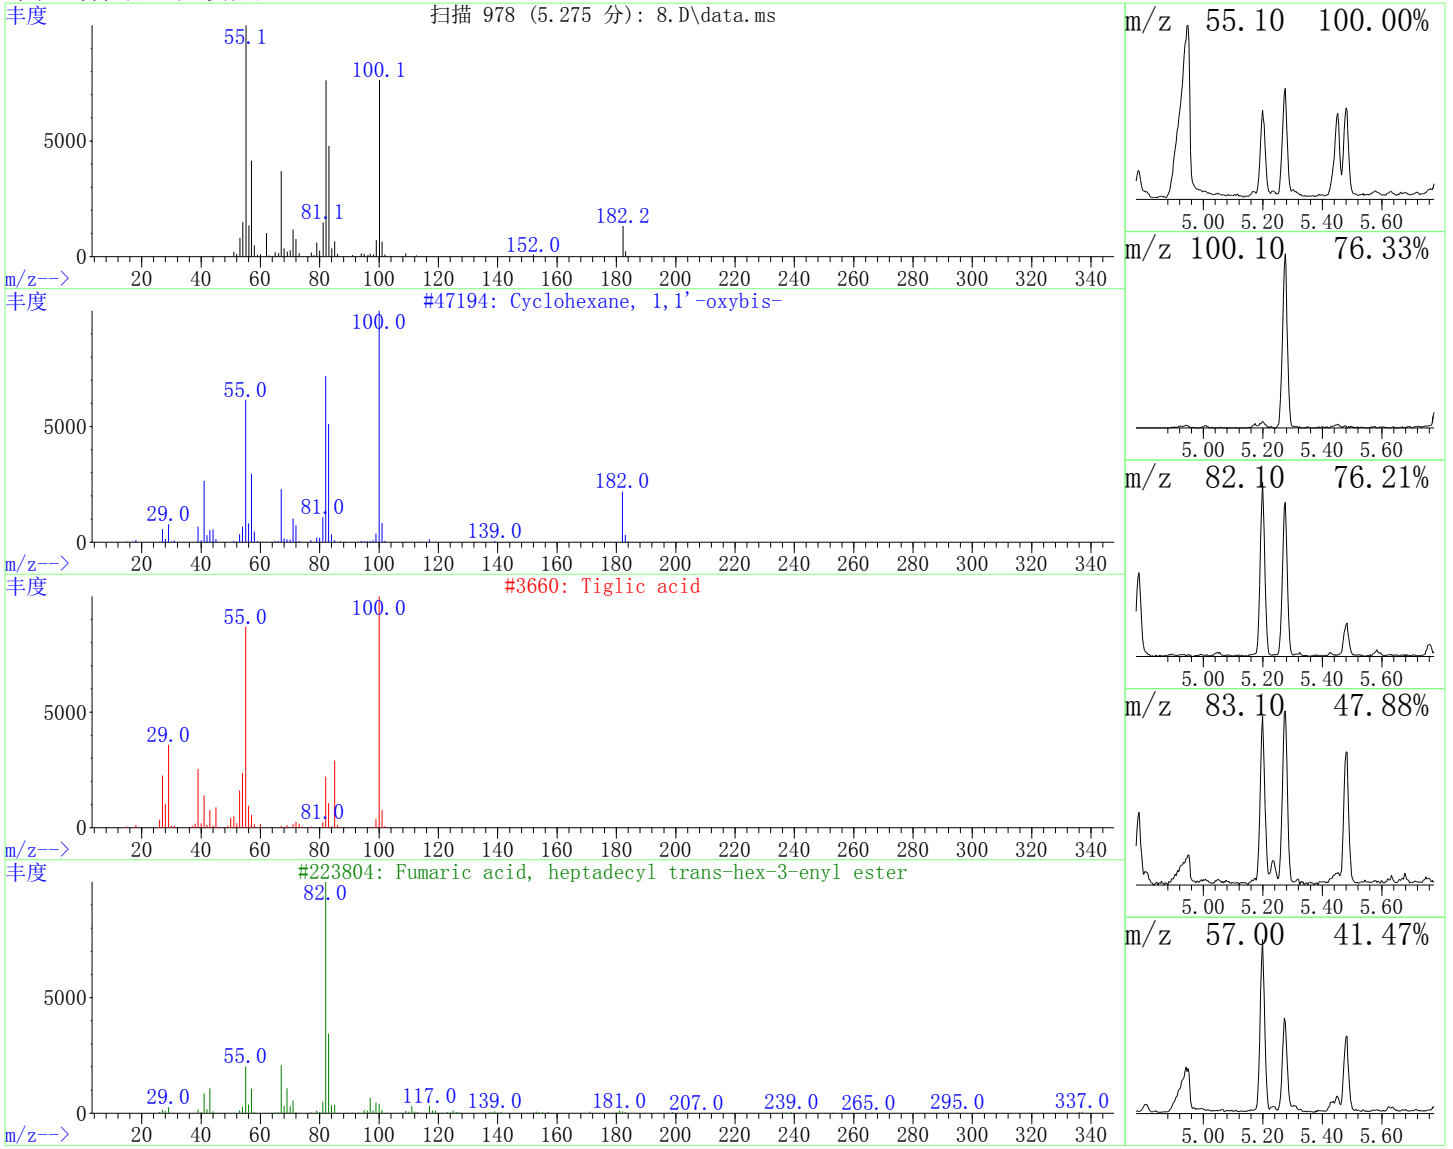

Data File: D:\msdchem\1\data\徐雄发\方岩雄-肖业鹏\8.D  
 样品: 8

峰编号: 12                      5.275 分钟处    面积: 2493456    面积 % 1.97

每个谱库中 3 个最匹配的记录。

Ref\#      CAS\#      匹配度

D:\DATABASE\DEMO.L      未检索到匹配。

C:\DATABASE\NIST11.L

- |                                       |        |              |    |
|---------------------------------------|--------|--------------|----|
| 1 Cyclohexane, 1,1'-oxybis-           | 47194  | 004645-15-2  | 93 |
| 2 Tiglic acid                         | 3660   | 000080-59-1  | 38 |
| 3 Fumaric acid, heptadecyl trans-h... | 223804 | 1000348-89-7 | 35 |

未知谱图基于顶点

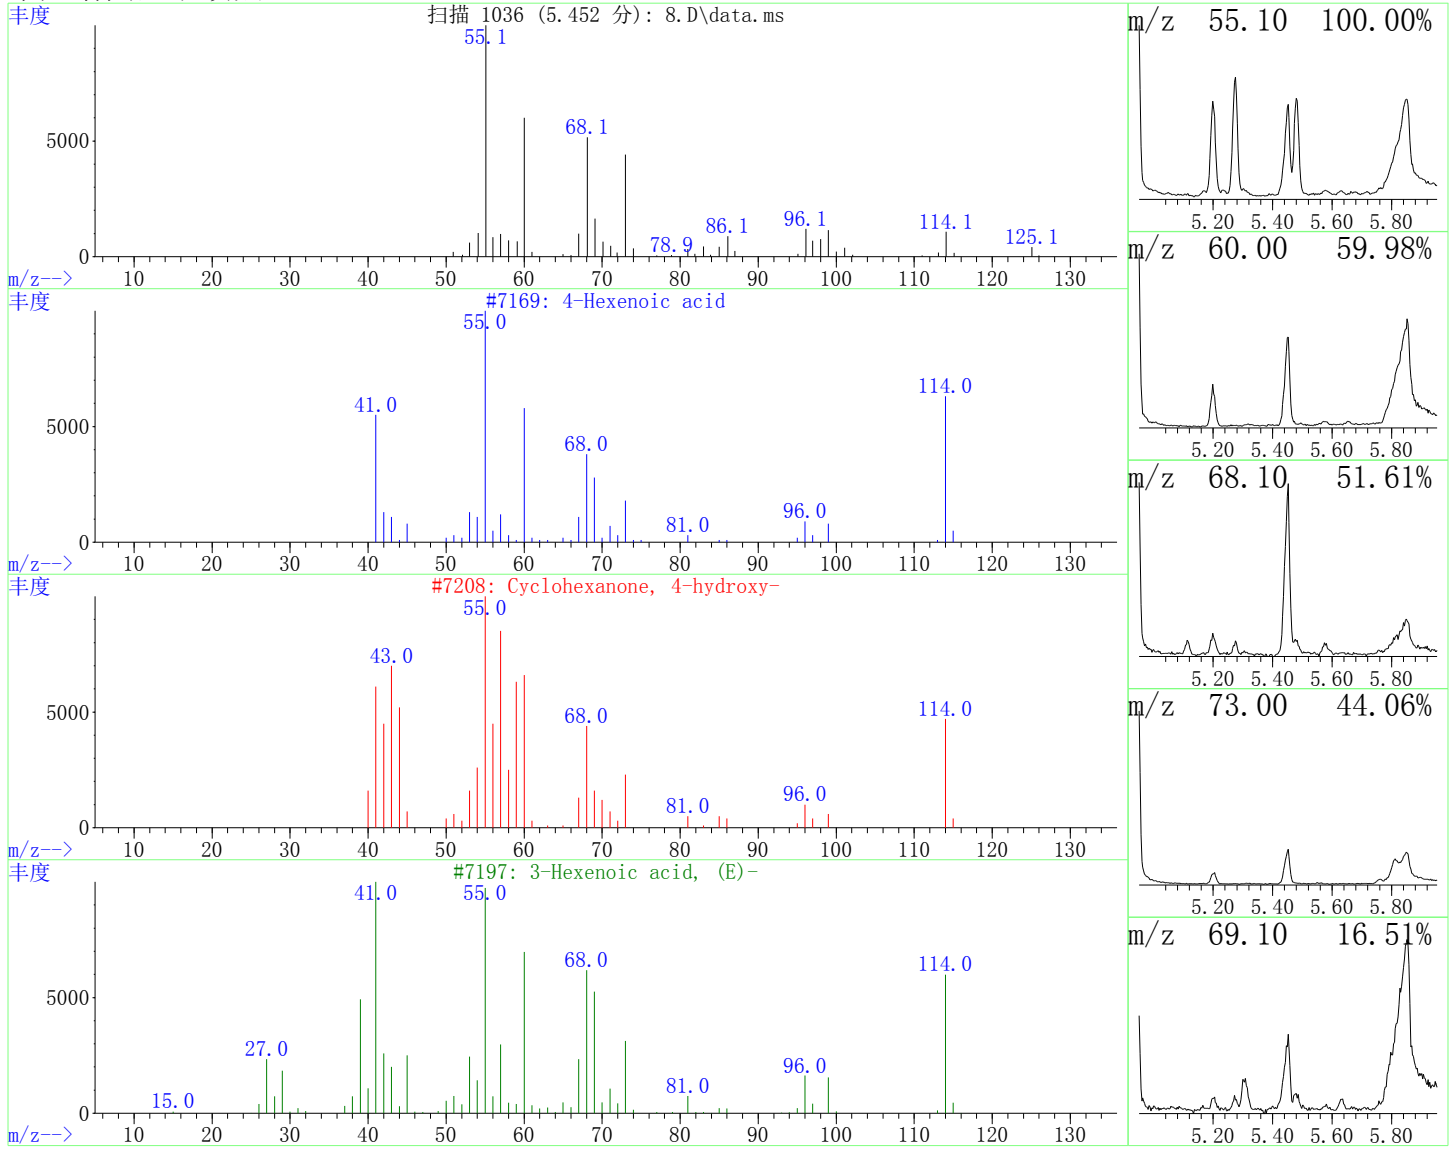

Data File: D:\msdchem\1\data\徐雄发\方岩雄-肖业鹏\8.D  
 样品: 8

峰编号: 13                    5.452 分钟处    面积: 1610644    面积 % 1.27

每个谱库中 3 个最匹配的记录。

Ref\#    CAS\#    匹配度

D:\DATABASE\DEMO.L    未检索到匹配。

C:\DATABASE\NIST11.L

|   |                           |      |             |    |
|---|---------------------------|------|-------------|----|
| 1 | 4-Hexenoic acid           | 7169 | 035194-36-6 | 83 |
| 2 | Cyclohexanone, 4-hydroxy- | 7208 | 013482-22-9 | 64 |
| 3 | 3-Hexenoic acid, (E)-     | 7197 | 001577-18-0 | 64 |

未知谱图基于顶点

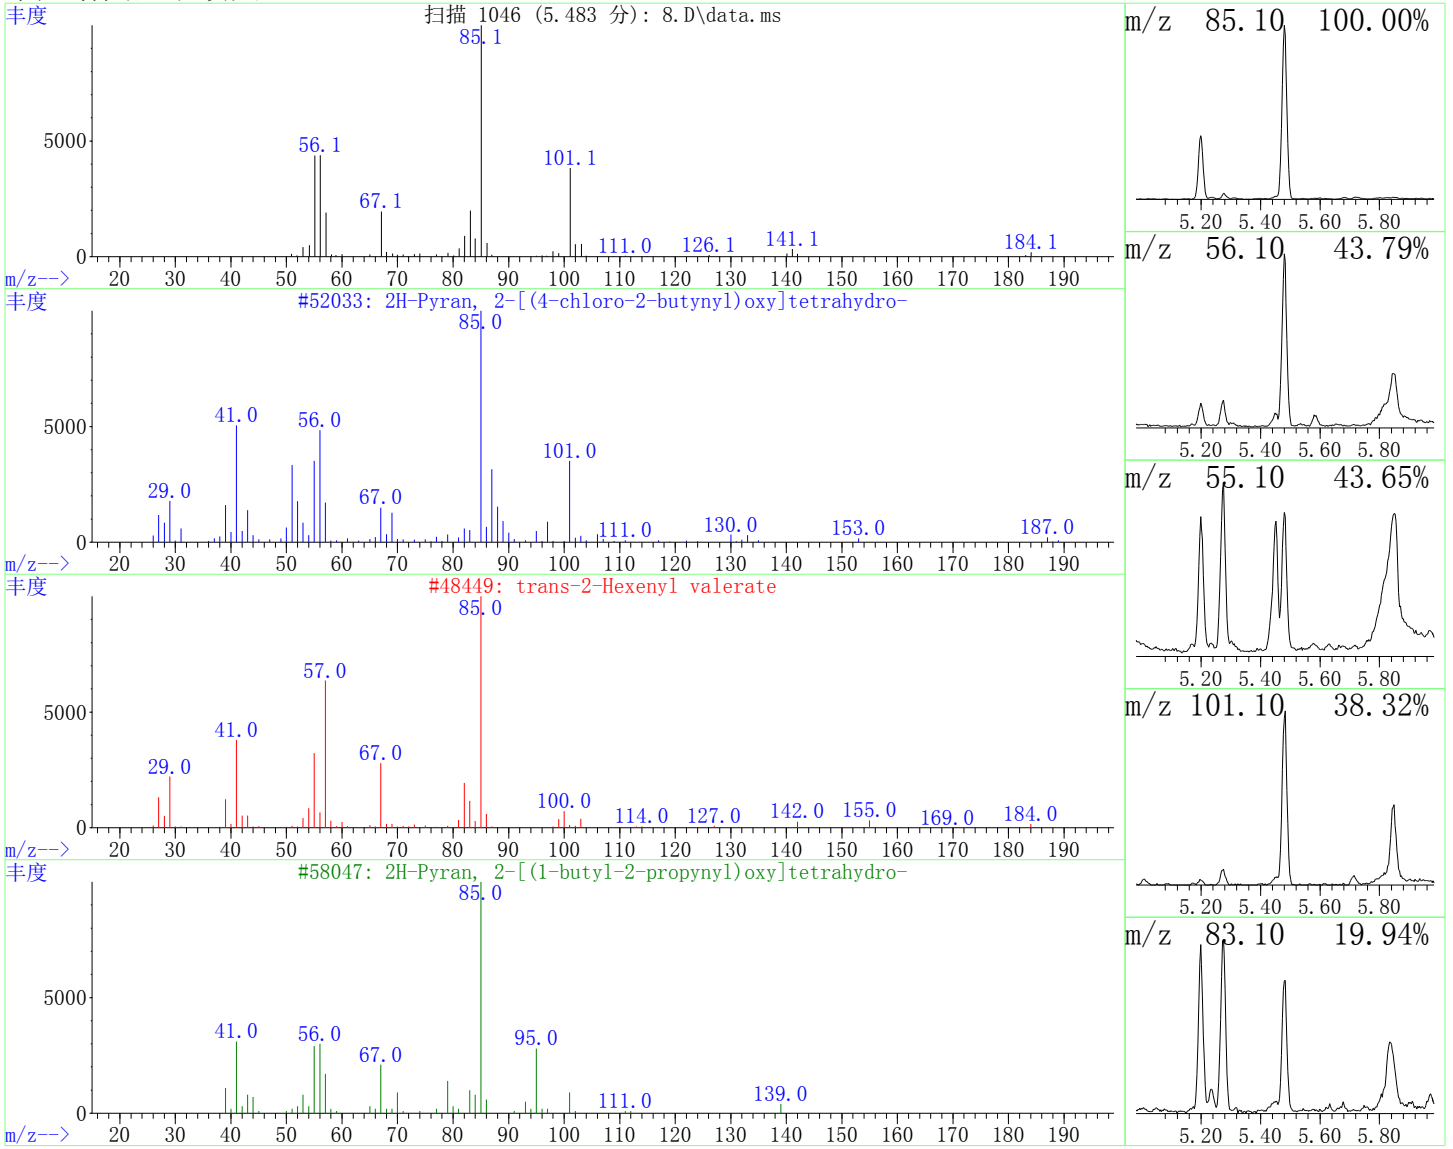

Data File: D:\msdchem\1\data\徐雄发\方岩雄-肖业鹏\8.D  
 样品: 8

峰编号: 14                      5.483 分钟处    面积: 2943356    面积 % 2.32

每个谱库中 3 个最匹配的记录。

Ref\#      CAS\#      匹配度

D:\DATABASE\DEMO.L      未检索到匹配。

C:\DATABASE\NIST11.L

- |   |                                                  |       |             |    |
|---|--------------------------------------------------|-------|-------------|----|
| 1 | 2H-Pyran, 2-[(4-chloro-2-butynyl)oxy]tetrahydro- | 52033 | 067727-01-9 | 50 |
| 2 | trans-2-Hexenyl valerate                         | 48449 | 056922-74-8 | 43 |
| 3 | 2H-Pyran, 2-[(1-butyl-2-propynyl)oxy]tetrahydro- | 58047 | 000831-83-4 | 42 |

未知谱图基于顶点

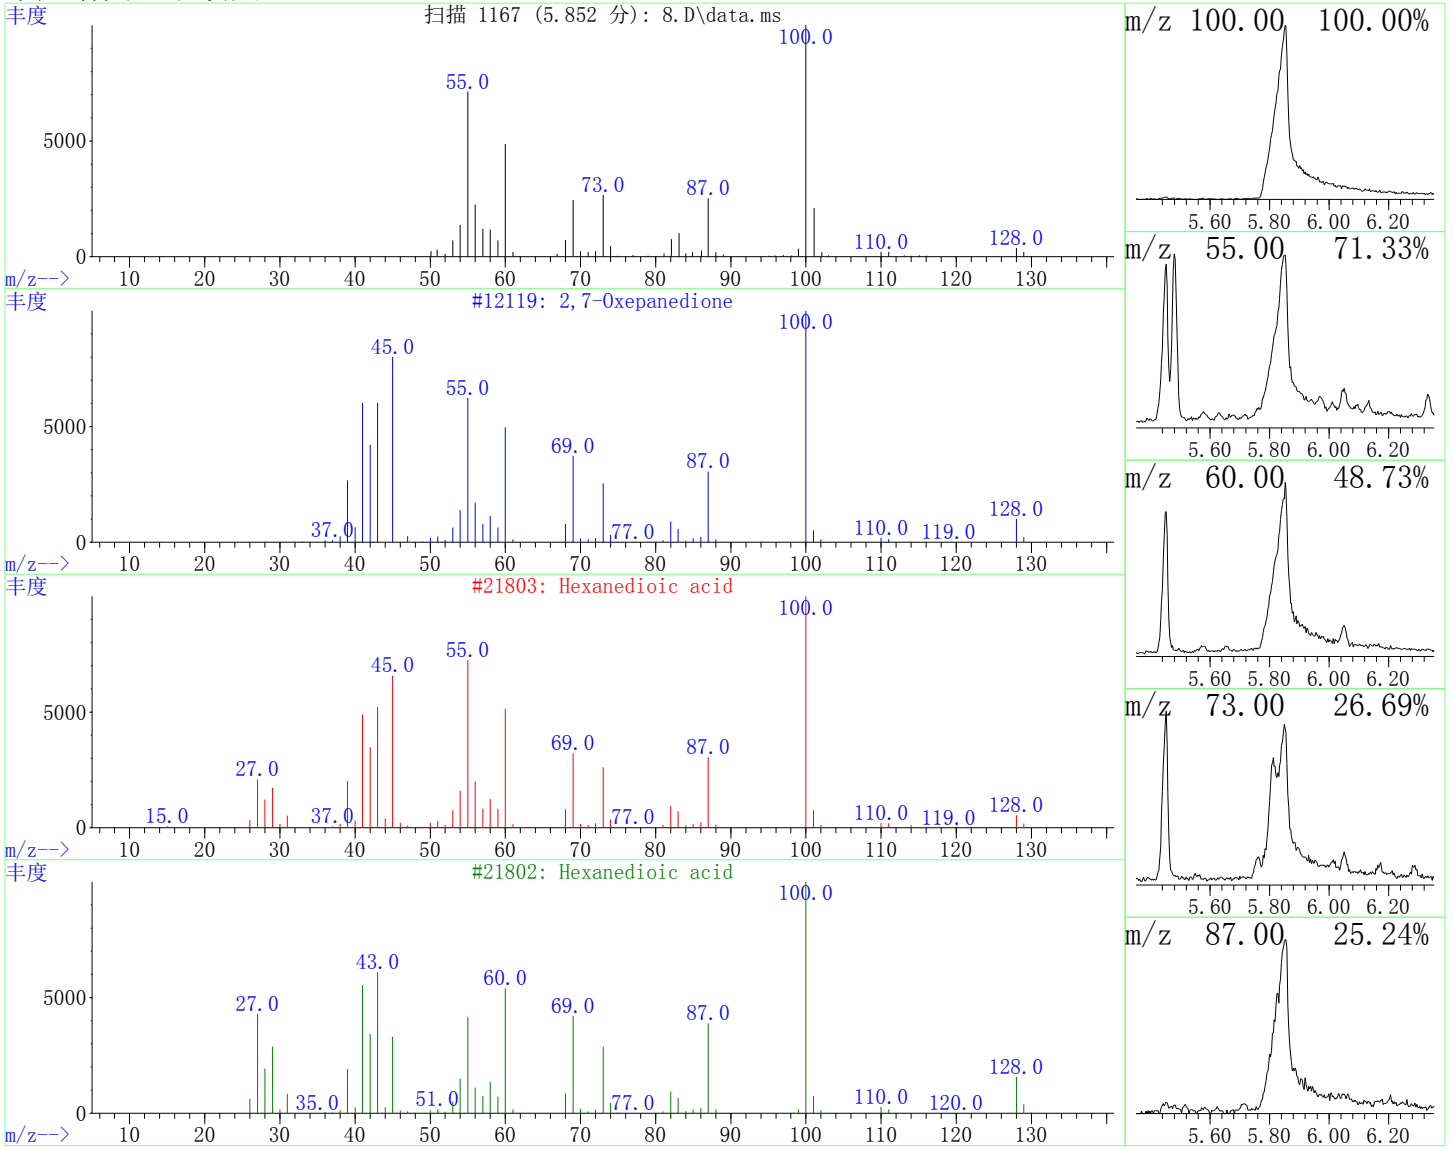

Data File: D:\msdchem\1\data\徐雄发\方岩雄-肖业鹏\8.D  
 样品: 8

峰编号: 15                      5.852 分钟处    面积: 6158234    面积 % 4.86

每个谱库中 3 个最匹配的记录。

Ref\#      CAS\#      匹配度

D:\DATABASE\DEMO.L      未检索到匹配。

C:\DATABASE\NIST11.L

|   |                  |       |             |    |
|---|------------------|-------|-------------|----|
| 1 | 2,7-Oxepanedione | 12119 | 002035-75-8 | 64 |
| 2 | Hexanedioic acid | 21803 | 000124-04-9 | 50 |
| 3 | Hexanedioic acid | 21802 | 000124-04-9 | 42 |



未知谱图基于顶点

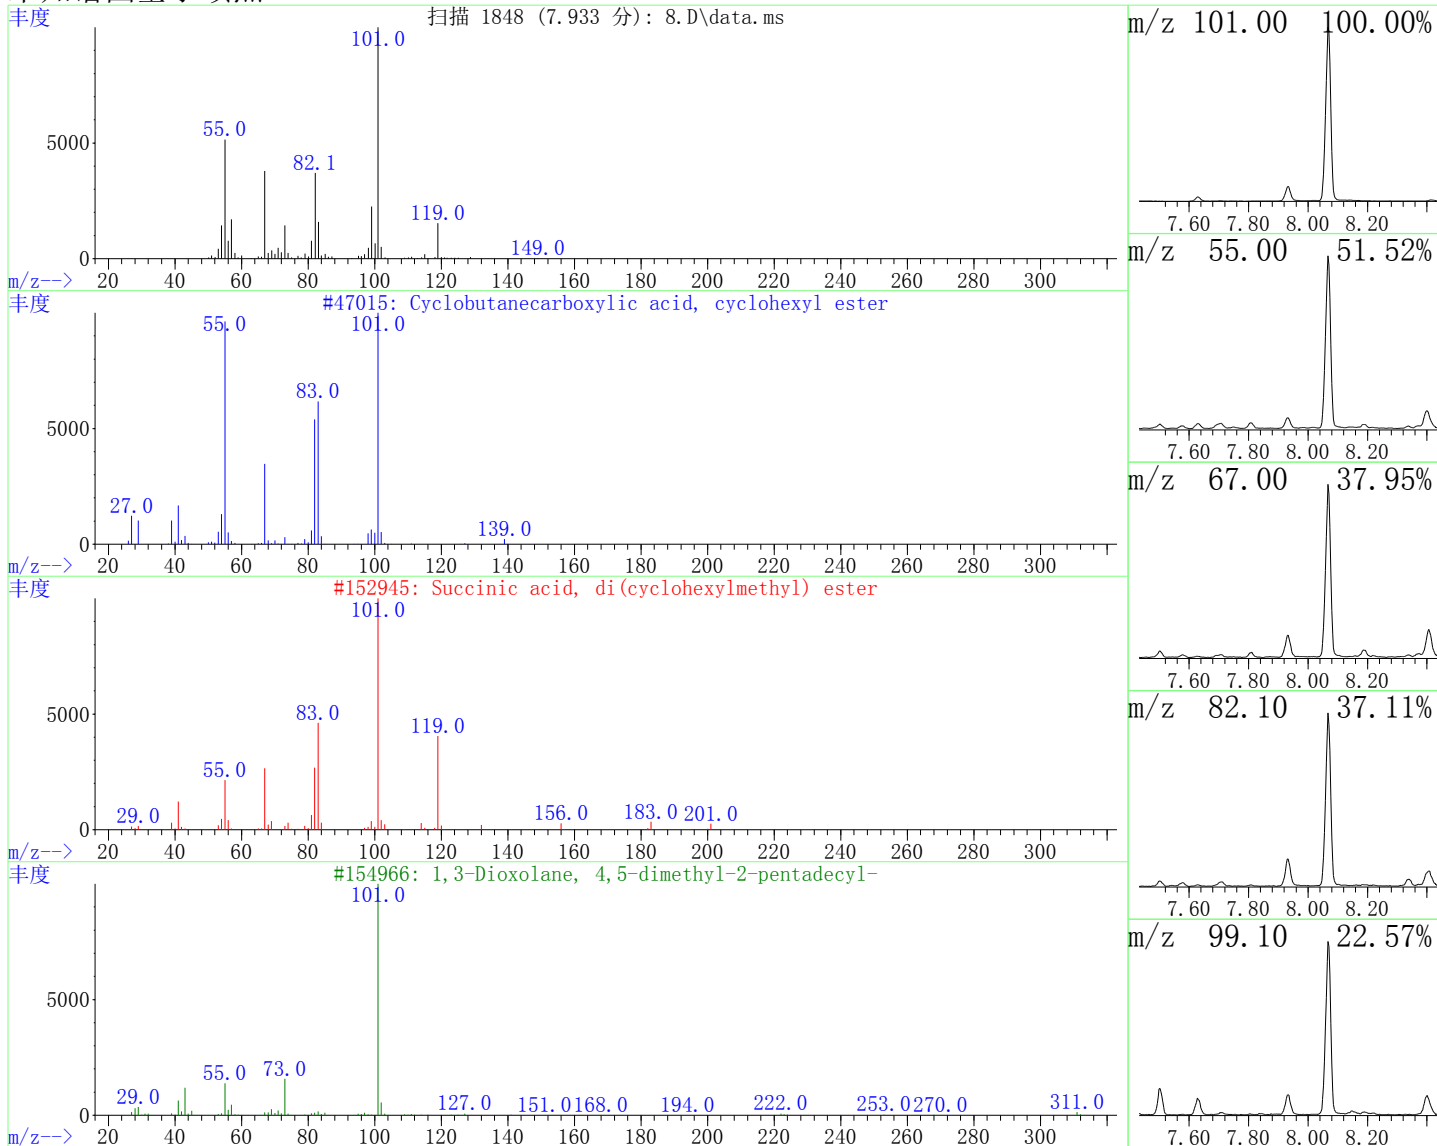

Data File: D:\msdchem\1\data\徐雄发\方岩雄-肖业鹏\8.D  
 样品: 8

峰编号: 16                      7.933 分钟处    面积:    2045648    面积 % 1.62

每个谱库中 3 个最匹配的记录。

Ref\#      CAS\#      匹配度

D:\DATABASE\DEMO.L      未检索到匹配。

C:\DATABASE\NIST11.L

- |                                       |        |              |    |
|---------------------------------------|--------|--------------|----|
| 1 Cyclobutanecarboxylic acid, cycl... | 47015  | 1000282-60-7 | 53 |
| 2 Succinic acid, di(cyclohexylmeth... | 152945 | 1000325-83-4 | 45 |
| 3 1,3-Dioxolane, 4,5-dimethyl-2-pe... | 154966 | 056599-61-2  | 43 |

未知谱图基于顶点

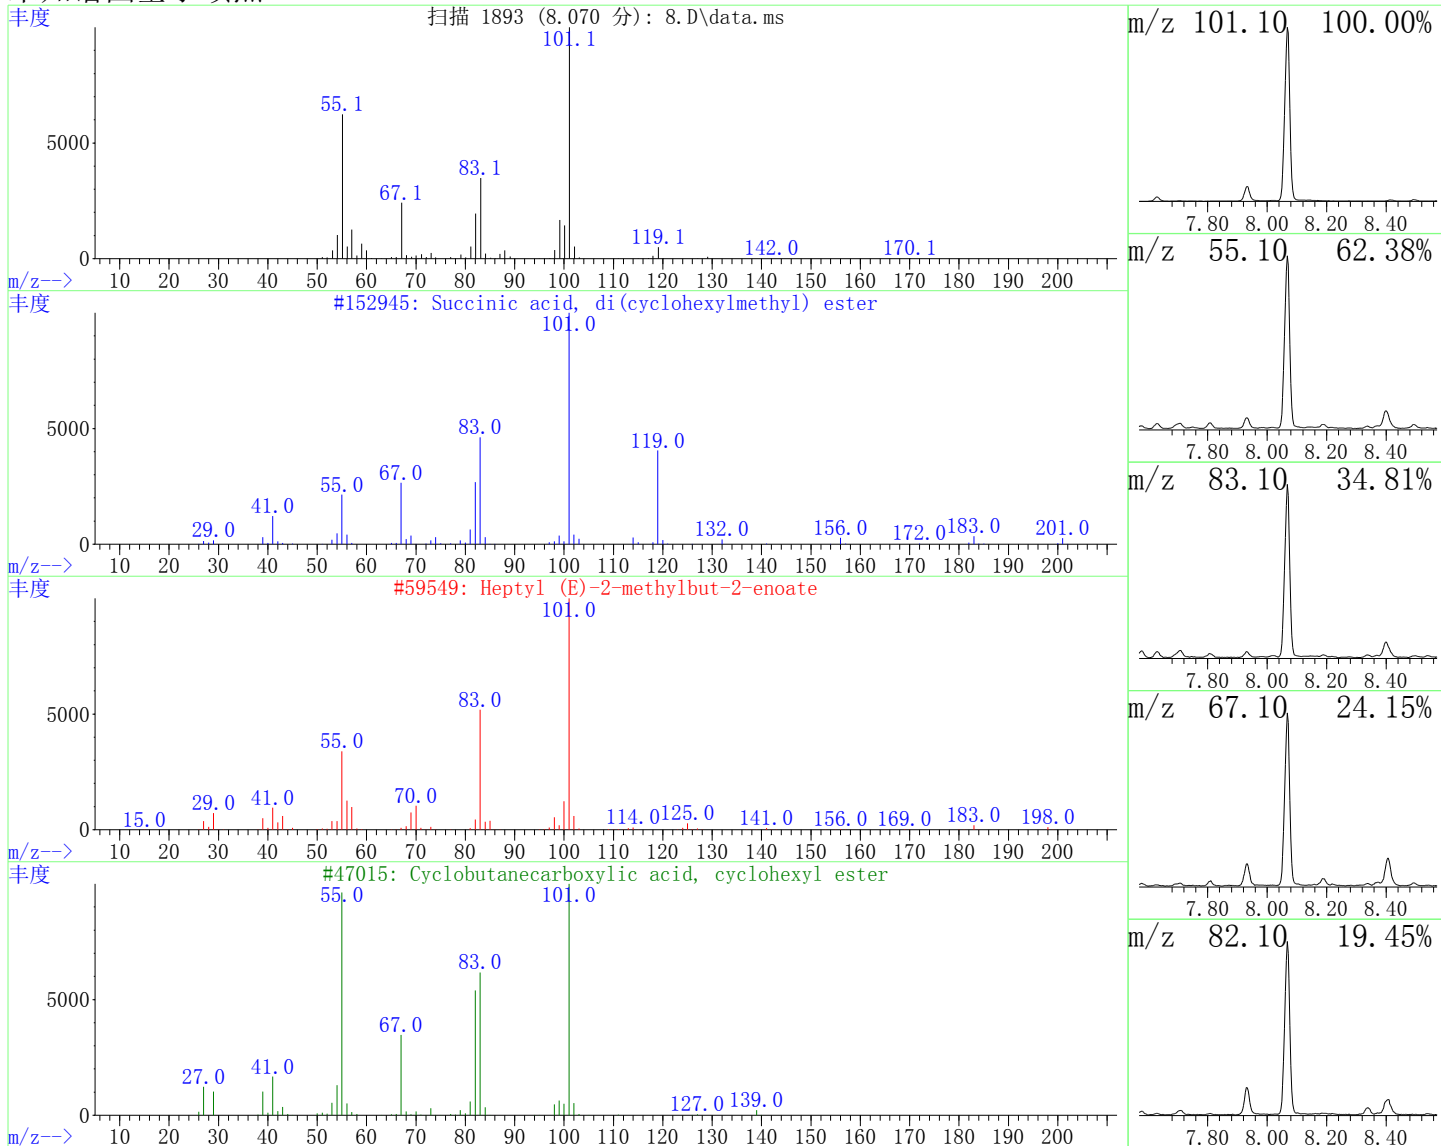

Data File: D:\msdchem\1\data\徐雄发\方岩雄-肖业鹏\8.D  
 样品: 8

峰编号: 17                      8.070 分钟处    面积: 23482636    面积 % 18.54

每个谱库中 3 个最匹配的记录。

Ref\#      CAS\#      匹配度

D:\DATABASE\DEMO.L      未检索到匹配。

C:\DATABASE\NIST11.L

- |   |                                     |        |              |    |
|---|-------------------------------------|--------|--------------|----|
| 1 | Succinic acid, di(cyclohexylmeth... | 152945 | 1000325-83-4 | 64 |
| 2 | Heptyl (E)-2-methylbut-2-enoate     | 59549  | 1000373-73-8 | 42 |
| 3 | Cyclobutanecarboxylic acid, cycl... | 47015  | 1000282-60-7 | 37 |

未知谱图基于顶点

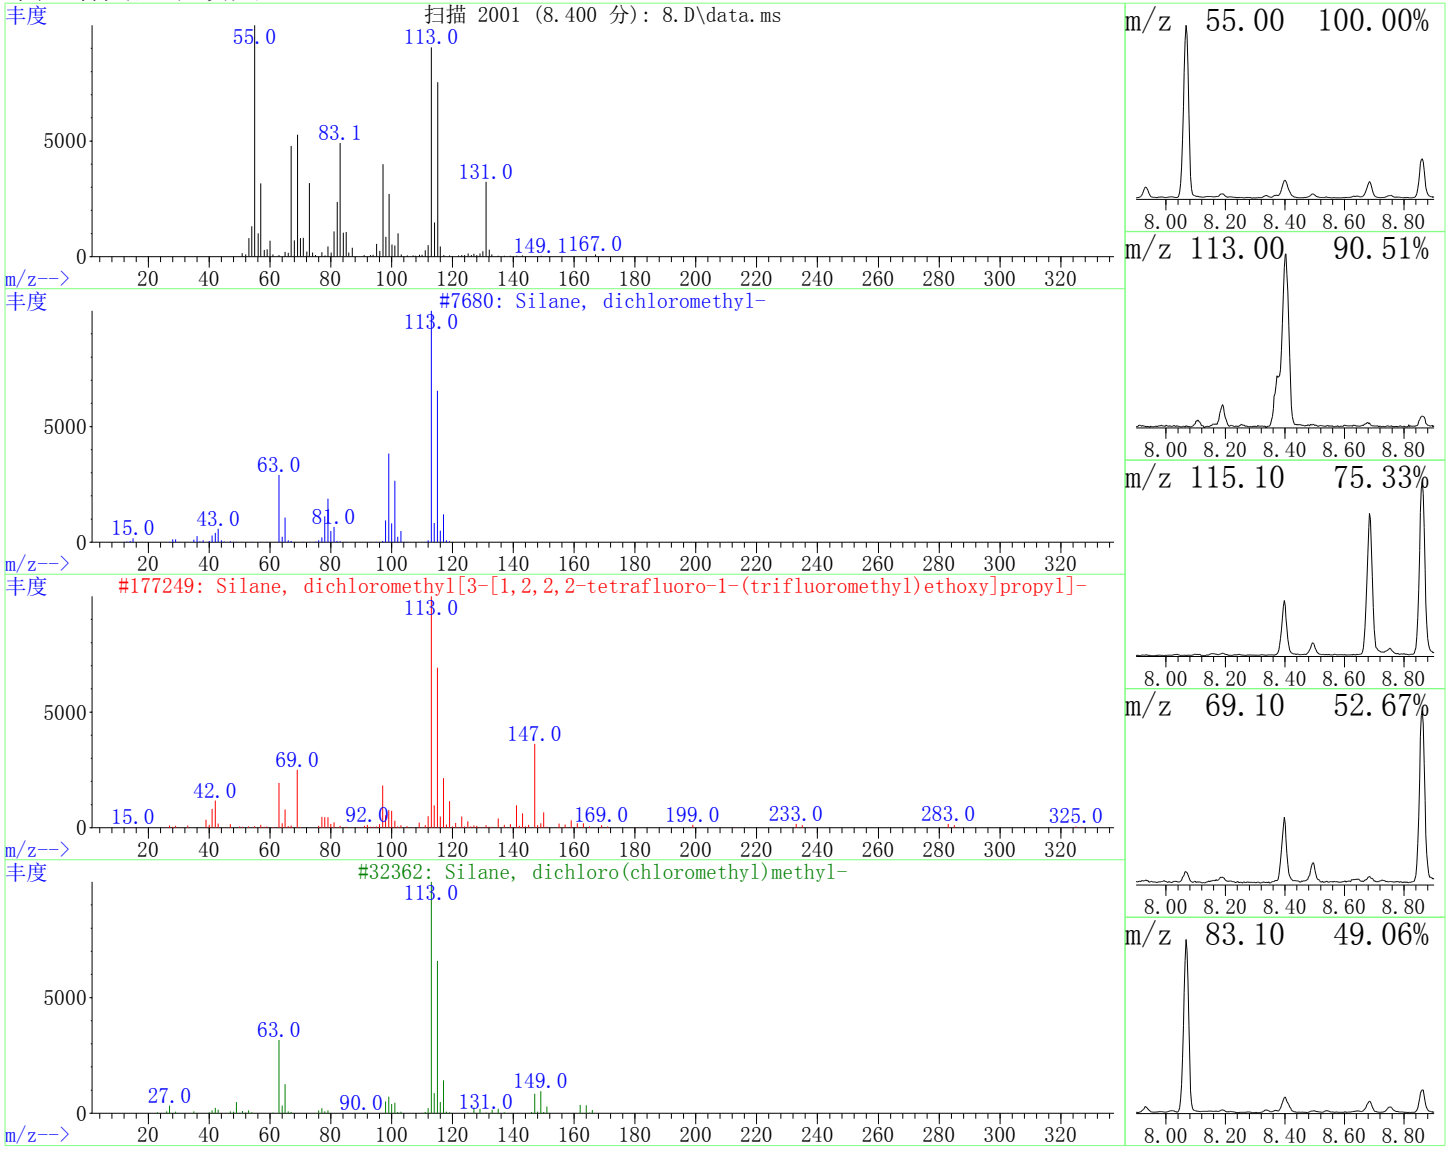

Data File: D:\msdchem\1\data\徐雄发\方岩雄-肖业鹏\8.D  
 样品: 8

峰编号: 18                      8.400 分钟处    面积: 5020177    面积 % 3.96

每个谱库中 3 个最匹配的记录。

Ref\#      CAS\#      匹配度

D:\DATABASE\DEMO.L      未检索到匹配。

C:\DATABASE\NIST11.L

|   |                                     |        |             |    |
|---|-------------------------------------|--------|-------------|----|
| 1 | Silane, dichloromethyl-             | 7680   | 000075-54-7 | 38 |
| 2 | Silane, dichloromethyl[3-[1,2,2,... | 177249 | 020006-68-2 | 38 |
| 3 | Silane, dichloro(chloromethyl)me... | 32362  | 001558-33-4 | 35 |

未知谱图基于顶点

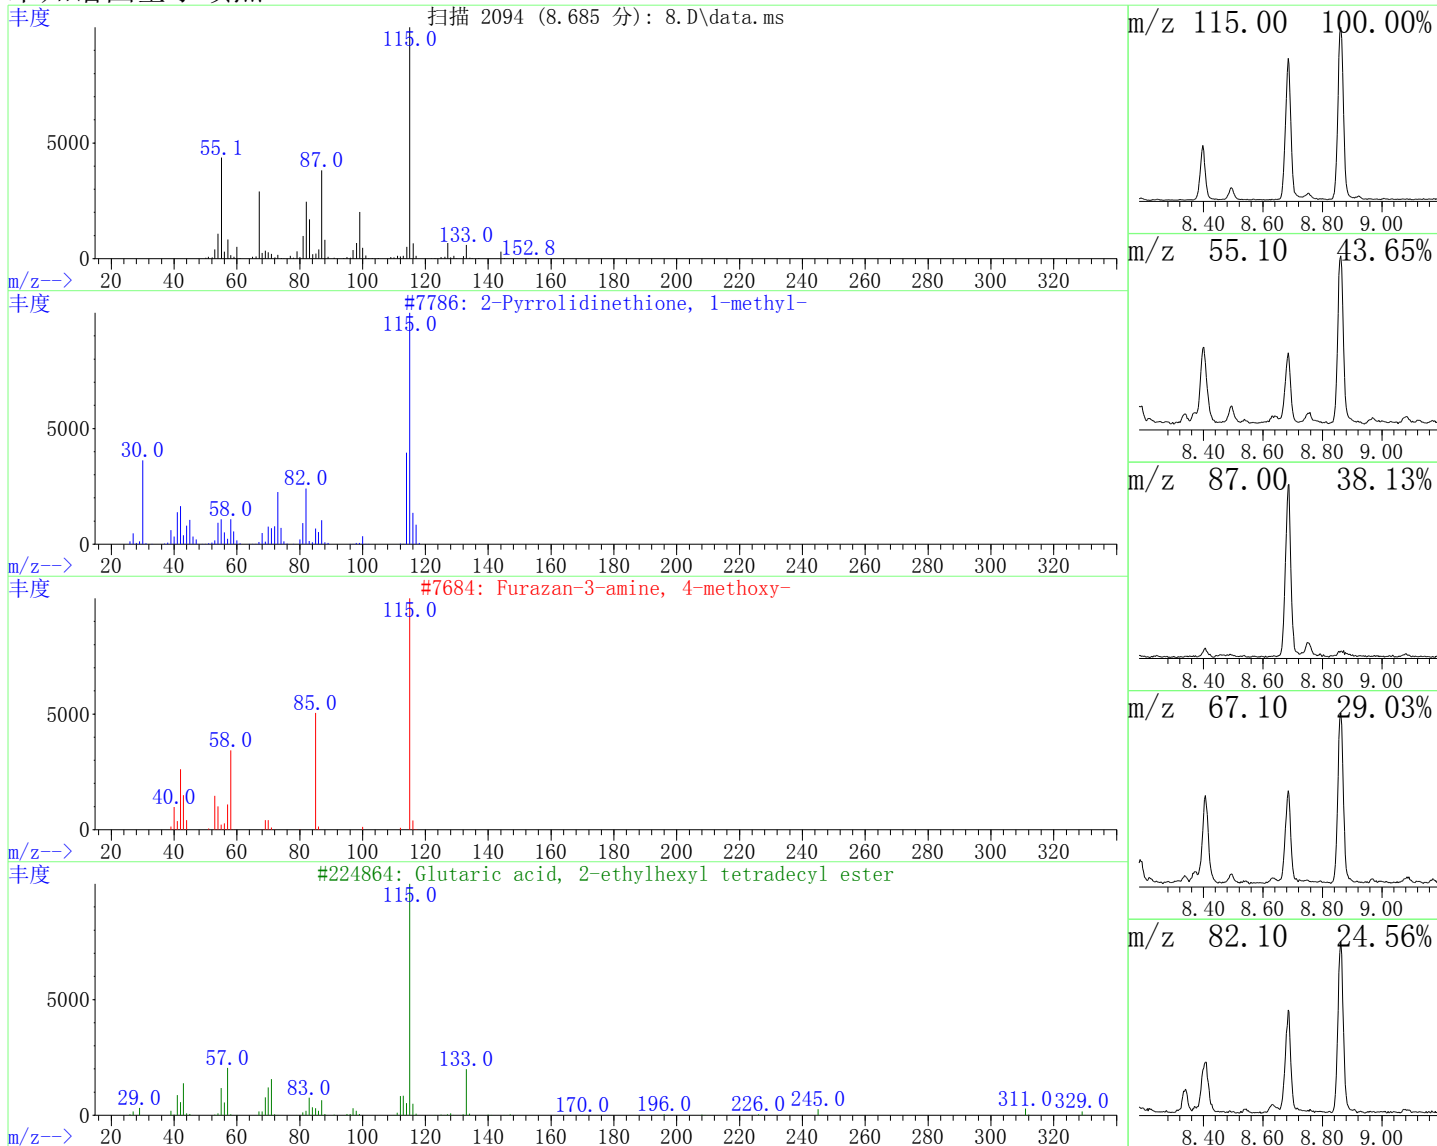

Data File: D:\msdchem\1\data\徐雄发\方岩雄-肖业鹏\8.D  
样品: 8

峰编号: 19                    8.685 分钟处    面积: 4041965    面积 % 3.19

每个谱库中 3 个最匹配的记录。

Ref\#    CAS\#    匹配度

D:\DATABASE\DEMO.L    未检索到匹配。

C:\DATABASE\NIST11.L

- |   |                                     |        |              |    |
|---|-------------------------------------|--------|--------------|----|
| 1 | 2-Pyrrolidinethione, 1-methyl-      | 7786   | 010441-57-3  | 32 |
| 2 | Furazan-3-amine, 4-methoxy-         | 7684   | 078350-48-8  | 27 |
| 3 | Glutaric acid, 2-ethylhexyl tetr... | 224864 | 1000358-24-6 | 25 |

未知谱图基于顶点

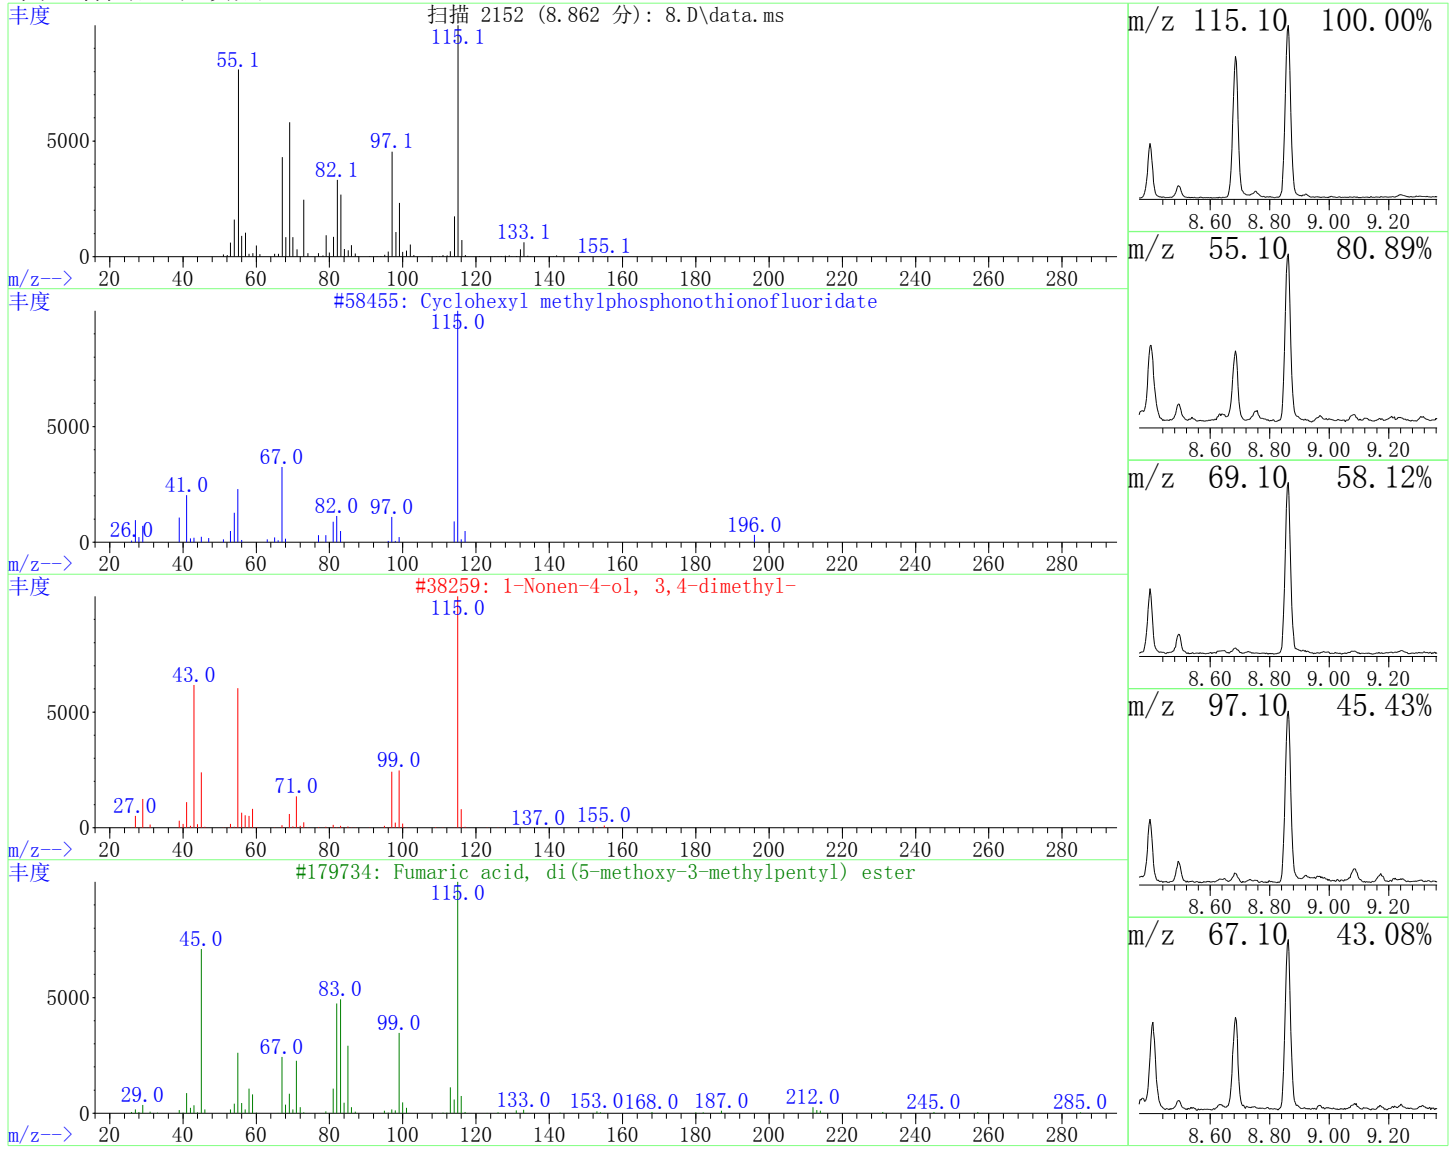

Data File: D:\msdchem\1\data\徐雄发\方岩雄-肖业鹏\8.D  
 样品: 8

峰编号: 20                      8.862 分钟处    面积: 7686124    面积 % 6.07

每个谱库中 3 个最匹配的记录。

Ref\#      CAS\#      匹配度

D:\DATABASE\DEMO.L      未检索到匹配。

C:\DATABASE\NIST11.L

- |                                       |        |              |    |
|---------------------------------------|--------|--------------|----|
| 1 Cyclohexyl methylphosphonothiono... | 58455  | 004241-34-3  | 37 |
| 2 1-Nonen-4-ol, 3,4-dimethyl-         | 38259  | 1000164-23-5 | 32 |
| 3 Fumaric acid, di(5-methoxy-3-met... | 179734 | 1000330-65-7 | 32 |

未知谱图基于顶点

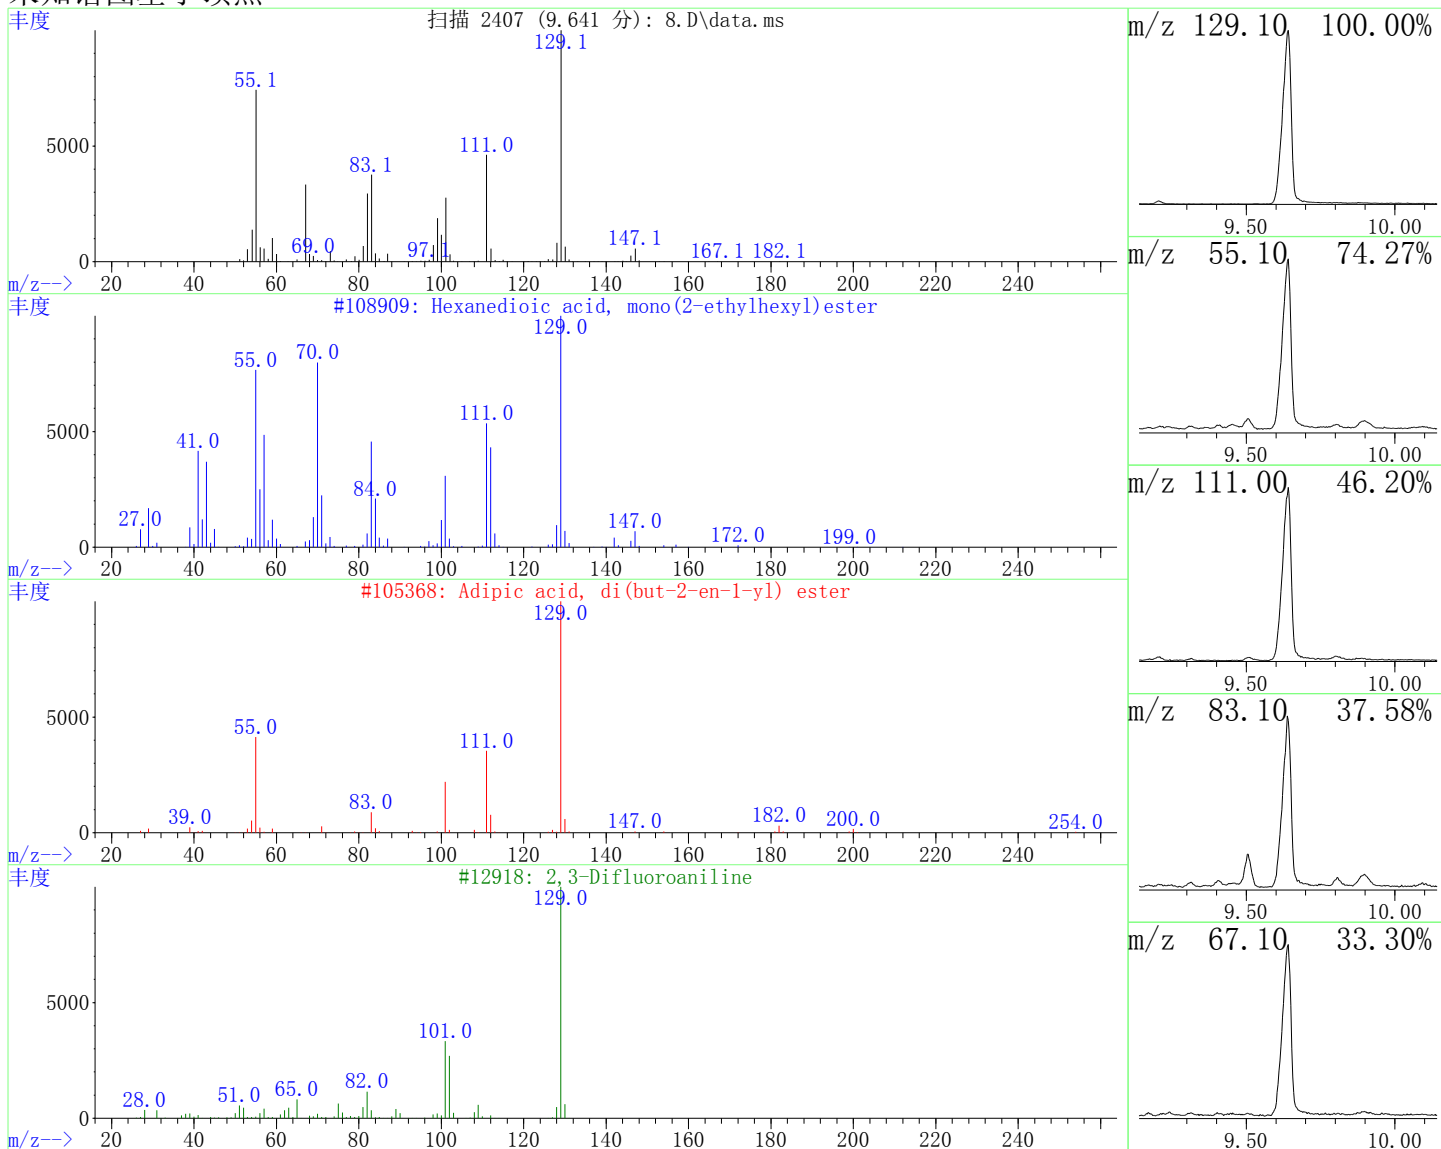

Data File: D:\msdchem\1\data\徐雄发\方岩雄-肖业鹏\8.D  
 样品: 8

峰编号: 21                      9.641 分钟处    面积: 18738765    面积 % 14.80

每个谱库中 3 个最匹配的记录。

Ref\#      CAS\#      匹配度

D:\DATABASE\DEMO.L      未检索到匹配。

C:\DATABASE\NIST11.L

- |                                       |        |              |    |
|---------------------------------------|--------|--------------|----|
| 1 Hexanedioic acid, mono(2-ethylhe... | 108909 | 004337-65-9  | 72 |
| 2 Adipic acid, di(but-2-en-1-yl) e... | 105368 | 1000324-71-1 | 40 |
| 3 2,3-Difluoroaniline                 | 12918  | 004519-40-8  | 38 |
